# Supplementary material for: Nonsense-Mediated RNA Decay Is a Unique Vulnerability of Cancer Cells Harboring SF3B1 or U2AF1 Mutations
Source: Oxford University Press journal article supplement (doi:10.1158/0008-5472.can-20-4016), 2021-07-02
Supplement: 00085472can204016-sup-256435_2_supp_7218116_qvf37g.xls [file 00085472can204016-sup-256435_2_supp_7218116_qvf37g.xls]

## Sheet: Suplementary table 3_NMD screen
Gene Enrichment from MAGeCK Analysis
Gene name	Number of sgRNAs in screen	Enrichment Score	Enrichment p-value	False discovery rate (FDR)	Rank	Number of enriched sgRNA
UPF1	6	4.11e-08	2.62e-07	0.00495	1	5
SMG6	6	1.18e-07	1.83e-06	0.017327	2	5
RUVBL1	6	1.38e-06	1.02e-05	0.064356	3	4
DNAAF2	6	4.23e-06	2.65e-05	0.125	4	5
SF3A3	6	9.52e-06	5.84e-05	0.175468	5	5
TRAM1L1	6	1.07e-05	6.63e-05	0.175468	6	2
CWC22	6	1.13e-05	6.84e-05	0.175468	7	5
EIF4A3	6	1.37e-05	7.99e-05	0.175468	8	5
SF3B5	6	1.5e-05	8.35e-05	0.175468	9	5
SF3B1	6	1.77e-05	9.35e-05	0.176733	10	4
RNF113A	6	2.02e-05	0.00010502	0.180468	11	4
RBM8A	6	4.33e-05	0.0002344	0.340823	12	3
PDP2	5	4.74e-05	0.0002234	0.340823	13	4
DGCR14	6	5.66e-05	0.00030145	0.357983	14	6
PRPF19	6	5.7e-05	0.00030302	0.357983	15	4
RPL21	5	6.17e-05	0.0002805	0.357983	16	4
UVSSA	6	7.34e-05	0.00038369	0.426616	17	5
HIST1H1B	6	8.2e-05	0.00043293	0.430693	18	3
CCDC61	5	9.1e-05	0.00040935	0.429868	19	4
QRFP	6	9.44e-05	0.00051516	0.473897	20	4
MCMDC2	6	0.00010121	0.00055157	0.473897	21	5
RPL13	5	0.00012419	0.00054764	0.473897	22	3
SMG1	6	0.00013989	0.0007755	0.610767	23	3
NAT6	6	0.00016324	0.00090907	0.641089	24	4
HSP90AA1	6	0.00017651	0.00097454	0.641089	25	4
CARNS1	6	0.00017692	0.00097873	0.641089	26	5
GTPBP10	6	0.00018267	0.0010175	0.641089	27	6
CUL2	6	0.00019584	0.0010866	0.662568	28	4
ART3	5	0.00020187	0.00092583	0.641089	29	5
PIKFYVE	6	0.00020474	0.0011285	0.666615	30	5
ZNF662	5	0.00021845	0.0010007	0.641089	31	3
ZNF436	6	0.00023538	0.0012925	0.740324	32	5
PCDHGC5	6	0.00024528	0.0013533	0.75233	33	5
DPPA3	6	0.00025684	0.0014083	0.760537	34	6
RSL24D1	6	0.00029398	0.0016162	0.848597	35	5
KLHDC2	6	0.00031513	0.0017199	0.856436	36	4
KBTBD11	6	0.0003295	0.0017933	0.856436	37	6
RASA3	6	0.0003306	0.0017995	0.856436	38	5
CBWD3	2	0.00034256	0.00066864	0.549505	39	2
RPS20	6	0.0003476	0.0018802	0.856436	40	3
BVES	6	0.00035697	0.0019321	0.856436	41	3
ZNF425	6	0.00035999	0.0019483	0.856436	42	5
HMGB1	6	0.00037169	0.0020054	0.861499	43	5
JAKMIP1	6	0.00038839	0.002096	0.872901	44	4
TFAP2C	5	0.00040906	0.0018572	0.856436	45	5
ZMYM4	6	0.00045478	0.0024464	0.927171	46	4
BBS5	6	0.00046364	0.002492	0.927171	47	4
RDX	6	0.00047096	0.002525	0.927171	48	5
SF3B2	6	0.00047555	0.0025507	0.927171	49	4
MICALL2	5	0.00047894	0.0021767	0.875395	50	4
FCGR1B	6	0.00049248	0.0026308	0.938259	51	5
ELL	6	0.00050261	0.0026884	0.941052	52	6
UGGT2	6	0.00053169	0.0028267	0.971467	53	3
DBC1	5	0.00055047	0.0024936	0.927171	54	2
CHD5	6	0.00056099	0.0029812	0.992282	55	4
NPIPB5	4	0.00058058	0.0021243	0.872901	56	3
SRPX2	6	0.00061401	0.0032693	0.992282	57	4
HMGB3	6	0.0006381	0.0033924	0.992282	58	5
PTRF	6	0.00064529	0.0034249	0.992282	59	4
CYLD	6	0.00064713	0.003437	0.992282	60	5
ADAM23	6	0.00064802	0.0034432	0.992282	61	6
TDRP	6	0.00066285	0.003514	0.992282	62	5
C6orf132	6	0.00069928	0.0037041	0.992282	63	3
ZFAND6	6	0.00071179	0.0037764	0.992282	64	4
WNT8A	6	0.00071804	0.0038094	0.992282	65	6
PCDHB6	6	0.00071938	0.0038183	0.992282	66	4
FAM150A	6	0.00073852	0.0039194	0.992282	67	2
SNRPA1	6	0.0007552	0.0040042	0.992282	68	4
BMP2	6	0.00075524	0.0040042	0.992282	69	5
CCDC77	6	0.00077362	0.00411	0.992282	70	5
LRG1	5	0.00081393	0.0036601	0.992282	71	5
IL32	6	0.00081733	0.0043264	0.992282	72	5
OR10G3	6	0.00082618	0.0043735	0.992282	73	6
TAS2R5	6	0.00085981	0.0045495	0.992282	74	4
CACTIN	6	0.00086705	0.0045841	0.992282	75	3
LTV1	6	0.00087495	0.0046197	0.992282	76	6
SMG5	6	0.00087768	0.0046302	0.992282	77	3
CRH	5	0.00088654	0.003956	0.992282	78	5
SERF1B	6	0.00090361	0.0047575	0.992282	79	3
METTL7B	6	0.00091528	0.0048203	0.992282	80	6
FABP5	6	0.00096117	0.0050456	0.992282	81	6
CHRNA7	5	0.00096736	0.0043164	0.992282	82	4
PRMT7	6	0.00097888	0.0051268	0.992282	83	2
HEY2	6	0.0010324	0.005374	0.992282	84	6
BASP1	6	0.0010391	0.0054128	0.992282	85	4
SEC24A	6	0.0010482	0.0054489	0.992282	86	4
AMOT	6	0.0010907	0.0056757	0.992282	87	4
LACC1	6	0.0010913	0.0056804	0.992282	88	5
SUV39H1	6	0.0010944	0.0056951	0.992282	89	4
CALCB	6	0.0011014	0.0057344	0.992282	90	3
AGTR2	6	0.0011452	0.0059481	0.992282	91	4
DRAM2	5	0.0011455	0.0051357	0.992282	92	4
XYLB	6	0.0011466	0.0059575	0.992282	93	4
RAB3GAP1	6	0.001168	0.0060686	0.992282	94	2
PPAP2A	6	0.0011721	0.0060848	0.992282	95	4
PES1	6	0.0011728	0.0060879	0.992282	96	2
ATOH1	6	0.0011953	0.0061974	0.992282	97	5
MAP3K10	6	0.0012025	0.006233	0.992282	98	1
MRPS10	6	0.0012025	0.006233	0.992282	99	3
RDH8	6	0.0012054	0.0062446	0.992282	100	6
HSFY2	6	0.0012151	0.0062854	0.992282	101	6
EXOG	5	0.0012351	0.0055207	0.992282	102	3
TIMM17A	6	0.0012584	0.0064965	0.992282	103	3
SLC45A4	6	0.0012611	0.0065044	0.992282	104	5
RPS7	6	0.0012795	0.0065918	0.992282	105	6
C3orf18	6	0.0012814	0.0066002	0.992282	106	4
PPP1R35	5	0.0012817	0.0057171	0.992282	107	4
CAAP1	6	0.0013068	0.0067149	0.992282	108	2
CAPN3	6	0.0013143	0.0067542	0.992282	109	3
TPM3	6	0.0013246	0.0068082	0.992282	110	6
SLC7A3	6	0.0013297	0.0068365	0.992282	111	3
DUSP10	6	0.0013468	0.0069166	0.992282	112	4
FBXO3	6	0.0013478	0.0069208	0.992282	113	2
LRRC59	6	0.0013576	0.0069627	0.992282	114	6
ASNSD1	6	0.0013702	0.0070193	0.992282	115	3
DSN1	6	0.0013763	0.0070481	0.992282	116	3
FRMD7	5	0.0013855	0.0061571	0.992282	117	5
C12orf66	6	0.0013953	0.007123	0.992282	118	5
VPS51	6	0.0013966	0.0071324	0.992282	119	3
TENM4	6	0.0014003	0.007157	0.992282	120	6
ZDHHC23	5	0.0014215	0.0063043	0.992282	121	1
NKAP	6	0.0014261	0.0072838	0.992282	122	3
FANCD2	6	0.0014381	0.0073409	0.992282	123	6
EFNB2	5	0.0014407	0.0063886	0.992282	124	4
CD52	6	0.0014565	0.0074268	0.992282	125	4
SFTPD	6	0.0014641	0.0074656	0.992282	126	4
COL13A1	5	0.0014665	0.0064923	0.992282	127	3
ZSWIM2	6	0.0014832	0.0075562	0.992282	128	5
DDX41	6	0.0014838	0.0075583	0.992282	129	5
PPP1R12B	5	0.0015165	0.0067081	0.992282	130	2
KIFC1	6	0.0015196	0.0077285	0.992282	131	5
NFKBID	6	0.0015383	0.0078175	0.992282	132	3
MORC4	5	0.0015612	0.0068841	0.992282	133	3
DUX2	6	0.0015938	0.0081088	0.992282	134	3
TCF7L2	6	0.0015947	0.0081109	0.992282	135	6
SCD5	6	0.0016155	0.0082162	0.992282	136	5
DCLRE1B	6	0.0016221	0.0082492	0.992282	137	6
PDCD11	6	0.0016387	0.0083277	0.992282	138	5
SGTB	6	0.0016401	0.0083345	0.992282	139	3
C1orf100	3	0.0016531	0.0046936	0.992282	140	3
CLCN4	5	0.0016653	0.0073205	0.992282	141	4
EEPD1	6	0.0016696	0.0084885	0.992282	142	3
OR52E2	5	0.0016907	0.0074231	0.992282	143	4
NUDT16L1	5	0.0017206	0.0075462	0.992282	144	4
PTGES3L	3	0.0017328	0.0049172	0.992282	145	2
TMEM92	5	0.0017475	0.0076714	0.992282	146	3
FKBP2	6	0.0017614	0.0089186	0.992282	147	4
LCE1A	5	0.0017617	0.0077254	0.992282	148	4
KCNQ2	6	0.0017896	0.0090511	0.992282	149	5
STOML2	5	0.0017941	0.0078668	0.992282	150	1
CCDC74B	6	0.0018369	0.0092858	0.992282	151	2
RHBDF1	6	0.001855	0.0093691	0.992282	152	4
FOXD4L5	5	0.0018602	0.0081659	0.992282	153	4
FEZF1	6	0.0018826	0.0094979	0.992282	154	6
DIAPH2	6	0.0018895	0.0095335	0.992282	155	4
R3HDM2	6	0.0018941	0.0095587	0.992282	156	5
DHX8	6	0.001896	0.0095692	0.992282	157	5
RNF128	6	0.0019209	0.0096923	0.992282	158	5
HSPBAP1	5	0.0019411	0.0084938	0.992282	159	5
GPR158	5	0.001952	0.008532	0.992282	160	3
RAB44	6	0.0019676	0.009928	0.992282	161	5
FAM104B	6	0.0019692	0.0099384	0.992282	162	6
C14orf180	5	0.0019713	0.0086022	0.992282	163	3
C17orf89	6	0.0019849	0.010014	0.992282	164	3
FAM110C	5	0.0020093	0.0087704	0.992282	165	5
ACAP1	6	0.0020195	0.010174	0.992282	166	4
DNAH5	5	0.0020269	0.0088474	0.992282	167	2
CLN3	6	0.002034	0.010244	0.992282	168	4
PTGDR	6	0.0020408	0.01028	0.992282	169	2
APOA4	6	0.0021049	0.010577	0.992282	170	6
OR5H14	6	0.0021364	0.01075	0.992282	171	6
SUZ12	6	0.0021389	0.010761	0.992282	172	5
ZC3H8	6	0.0021824	0.010966	0.992282	173	6
BSPRY	6	0.0021916	0.011013	0.992282	174	4
DPCD	6	0.0021949	0.011029	0.992282	175	2
RPL30	6	0.0022083	0.011088	0.992282	176	3
WNT16	6	0.0022102	0.011095	0.992282	177	5
CABIN1	6	0.0022162	0.011127	0.992282	178	6
TSGA10	6	0.0022289	0.011187	0.992282	179	6
CBWD6	6	0.0022293	0.011188	0.992282	180	5
MSRA	6	0.0022433	0.011247	0.992282	181	5
PPP2R2A	6	0.0022533	0.011294	0.992282	182	5
CYBA	6	0.0022642	0.011348	0.992282	183	3
ARIH1	5	0.0022892	0.0099447	0.992282	184	2
C1orf43	6	0.0022981	0.011495	0.992282	185	4
CREB1	6	0.0022995	0.011507	0.992282	186	5
VPS37B	6	0.00232	0.011595	0.992282	187	4
DSEL	6	0.0023226	0.011604	0.992282	188	4
PMVK	6	0.002348	0.01173	0.992282	189	2
DAAM1	6	0.0023514	0.011749	0.992282	190	2
RARS	5	0.0023545	0.010224	0.992282	191	4
ORC2	6	0.0023617	0.011806	0.992282	192	5
PHF7	6	0.0023854	0.011905	0.992282	193	3
TMEM74	6	0.0023979	0.011969	0.992282	194	4
UNC5D	5	0.0024336	0.010534	0.992282	195	3
SRCAP	6	0.002453	0.012231	0.992282	196	4
SLC17A3	5	0.0024637	0.010664	0.992282	197	4
GALT	6	0.0024695	0.012304	0.992282	198	4
WDR73	6	0.0024709	0.012309	0.992282	199	5
ZNF185	6	0.002485	0.012376	0.992282	200	3
CD320	6	0.0024876	0.012385	0.992282	201	3
LUZP2	6	0.0024991	0.012431	0.992282	202	4
MTRF1	6	0.0025004	0.01244	0.992282	203	5
GPER	4	0.0025035	0.0089065	0.992282	204	3
DYNC1I1	6	0.0025113	0.012487	0.992282	205	4
TIGD4	6	0.0025288	0.012552	0.992282	206	4
IRAK2	6	0.0025348	0.012575	0.992282	207	5
CRX	5	0.0025427	0.010988	0.992282	208	5
COQ5	6	0.0025651	0.012692	0.992282	209	5
RBBP6	6	0.0025977	0.012824	0.992282	210	4
GNAT2	6	0.0025993	0.01283	0.992282	211	3
IFI16	5	0.0026154	0.011305	0.992282	212	5
CPSF6	6	0.0026243	0.012928	0.992282	213	3
FIG4	5	0.002627	0.01136	0.992282	214	4
ERAS	6	0.0026551	0.013049	0.992282	215	1
ZC3H14	6	0.0026619	0.013074	0.992282	216	2
ZNF280C	6	0.0026733	0.01313	0.992282	217	5
TMEM105	6	0.0026773	0.013142	0.992282	218	5
RARRES1	6	0.0026873	0.013183	0.992282	219	4
TTLL10	6	0.0026908	0.013196	0.992282	220	3
NACA	5	0.0027025	0.011661	0.992282	221	2
CWC15	6	0.0027109	0.01328	0.992282	222	3
KCNH5	6	0.0027283	0.01334	0.992282	223	5
DCUN1D5	6	0.0027657	0.013471	0.992282	224	5
WDR38	6	0.0027668	0.013474	0.992282	225	2
HES5	5	0.0027715	0.011946	0.992282	226	4
TMEM170A	6	0.0028112	0.013639	0.992282	227	2
AIRE	6	0.0028226	0.013684	0.992282	228	2
ADM2	5	0.0028466	0.012258	0.992282	229	4
APBA3	6	0.0028483	0.013776	0.992282	230	5
MTTP	6	0.0028975	0.01395	0.992282	231	5
ATOH8	6	0.0029063	0.013986	0.992282	232	2
MAGEA8	6	0.0029063	0.013986	0.992282	233	3
TP53I11	6	0.0029152	0.014016	0.992282	234	4
GRAMD2	5	0.0029227	0.012552	0.992282	235	5
PPFIBP1	6	0.0029304	0.014079	0.992282	236	3
UROC1	6	0.0029439	0.014133	0.992282	237	5
DMRT3	6	0.0029526	0.014161	0.992282	238	4
BIK	5	0.0029566	0.012696	0.992282	239	5
PIK3R6	5	0.0029614	0.012716	0.992282	240	5
CCDC85B	5	0.0029772	0.012776	0.992282	241	3
CATSPER2	6	0.0029932	0.014314	0.992282	242	4
THBS4	5	0.0030266	0.012972	0.992282	243	5
RSU1	6	0.0030347	0.014473	0.992282	244	4
SPANXE	6	0.0030459	0.014515	0.992282	245	3
CLCA4	6	0.0030521	0.014537	0.992282	246	4
MAP1LC3A	6	0.0030713	0.014618	0.992282	247	3
C2CD2L	6	0.0030776	0.014639	0.992282	248	4
ZNF552	4	0.0030935	0.010917	0.992282	249	4
EFNA3	6	0.0031017	0.01473	0.992282	250	1
DPF3	6	0.003102	0.014733	0.992282	251	4
ASPH	6	0.0031328	0.014848	0.992282	252	5
HIST1H2BN	6	0.0031575	0.014933	0.992282	253	3
MSH4	6	0.0031938	0.015061	0.992282	254	4
SLC52A2	6	0.0032074	0.015105	0.992282	255	3
ZNF596	6	0.0032114	0.015122	0.992282	256	2
GTF3C1	6	0.003212	0.015127	0.992282	257	5
PCGF3	6	0.0032133	0.015136	0.992282	258	2
PTPN23	6	0.0032379	0.015233	0.992282	259	5
CHST3	6	0.0032454	0.015263	0.992282	260	3
FGF21	6	0.0032667	0.015336	0.992282	261	4
MEGF11	6	0.0032691	0.015347	0.992282	262	1
PSME1	6	0.0032692	0.015348	0.992282	263	5
MEX3A	6	0.0033082	0.015487	0.992282	264	3
GOLGA6L4	5	0.0033431	0.014257	0.992282	265	3
OTUB1	6	0.0033576	0.015687	0.992282	266	5
TP63	6	0.0033662	0.015722	0.992282	267	4
TWIST1	6	0.0033665	0.015724	0.992282	268	4
BRK1	6	0.0033807	0.015772	0.992282	269	4
ZSCAN23	5	0.0034009	0.014482	0.992282	270	5
DMWD	6	0.0034069	0.015886	0.992282	271	4
TUBGCP4	4	0.0034159	0.012023	0.992282	272	4
SLC22A17	6	0.0034213	0.015945	0.992282	273	5
CYP26C1	4	0.0034309	0.012081	0.992282	274	3
SLC22A10	5	0.0034444	0.014651	0.992282	275	3
EPB41L2	6	0.0034522	0.016059	0.992282	276	4
EARS2	6	0.003469	0.016131	0.992282	277	4
ZNF512B	6	0.0034923	0.016215	0.992282	278	3
HRSP12	6	0.0034923	0.016215	0.992282	279	4
GRID2IP	6	0.0035343	0.016371	0.992282	280	5
CR1	6	0.0035462	0.016414	0.992282	281	5
2020-09-04	5	0.003548	0.01507	0.992282	282	4
CEACAM4	6	0.0035481	0.016421	0.992282	283	4
ABCF1	6	0.0035493	0.016425	0.992282	284	5
FAM53A	6	0.0035769	0.016527	0.992282	285	4
API5	6	0.0035787	0.016534	0.992282	286	5
GPR34	6	0.0036039	0.016625	0.992282	287	2
SIGLECL1	5	0.0036316	0.015387	0.992282	288	5
CCDC101	6	0.0036597	0.016832	0.992282	289	3
CPSF7	6	0.0036608	0.01684	0.992282	290	5
IFT52	6	0.0037246	0.017082	0.992282	291	4
SMR3A	4	0.0037416	0.013127	0.992282	292	4
RAB7A	6	0.0037992	0.017374	0.992282	293	3
DND1	6	0.0037992	0.017374	0.992282	294	2
THAP11	6	0.0038018	0.017381	0.992282	295	5
FXYD2	4	0.00382	0.013382	0.992282	296	3
ZSWIM6	6	0.0038286	0.01748	0.992282	297	4
GPR150	6	0.0038303	0.017486	0.992282	298	5
COL24A1	5	0.0038321	0.016187	0.992282	299	3
C1orf105	6	0.0038338	0.017502	0.992282	300	4
KCNJ5	6	0.0038565	0.017587	0.992282	301	5
EIF6	6	0.0038828	0.017691	0.992282	302	1
CINP	5	0.0038993	0.016461	0.992282	303	5
PILRB	5	0.0039032	0.016482	0.992282	304	5
ERVV-1	6	0.0039131	0.017807	0.992282	305	3
DGKG	4	0.00393	0.013733	0.992282	306	2
FNDC7	5	0.0039331	0.016604	0.992282	307	3
SPRR1B	6	0.0039333	0.017887	0.992282	308	4
CATSPER4	6	0.0039386	0.017911	0.992282	309	3
KRTAP4-5	6	0.0039608	0.018	0.992282	310	2
SCN8A	6	0.0039739	0.018043	0.992282	311	3
MCM9	6	0.0039944	0.018111	0.992282	312	2
TRIP12	6	0.0040023	0.018144	0.992282	313	4
TREM1	6	0.004023	0.01821	0.992282	314	5
GLDC	6	0.0040502	0.018306	0.992282	315	3
MMP15	5	0.0040701	0.017154	0.992282	316	5
CCDC9	6	0.004089	0.018449	0.992282	317	4
LZIC	6	0.0041059	0.018505	0.992282	318	3
JUND	5	0.0041201	0.017348	0.992282	319	2
FAM25C	3	0.0041211	0.011379	0.992282	320	3
TCEB2	6	0.0041585	0.018688	0.992282	321	3
SCAF11	5	0.0041666	0.017548	0.992282	322	2
DPY19L1	5	0.0041718	0.017574	0.992282	323	3
MPC2	5	0.0041721	0.017576	0.992282	324	4
CROCC	6	0.0041727	0.018746	0.992282	325	5
IQCD	5	0.0042022	0.017699	0.992282	326	4
DSTN	5	0.0042028	0.017701	0.992282	327	5
PCNA	6	0.0042034	0.018852	0.992282	328	4
FBXO25	6	0.0042372	0.018982	0.992282	329	4
KRTAP19-8	6	0.0042453	0.019015	0.992282	330	3
PPP1R27	6	0.0042453	0.019015	0.992282	331	3
EIF2S1	5	0.0043172	0.018134	0.992282	332	4
SRRD	6	0.0043204	0.019312	0.992282	333	4
RASSF6	6	0.0043265	0.019332	0.992282	334	4
ANGEL1	6	0.004329	0.019342	0.992282	335	3
PICALM	6	0.0043482	0.019419	0.992282	336	4
OR7E24	6	0.0043636	0.019474	0.992282	337	3
OR51D1	6	0.0043704	0.019496	0.992282	338	3
EDC3	6	0.0043782	0.019527	0.992282	339	4
RFTN1	6	0.0043789	0.019529	0.992282	340	5
PTH2R	6	0.0043795	0.019531	0.992282	341	3
ETS1	6	0.0043847	0.019551	0.992282	342	4
MT4	6	0.0043932	0.019574	0.992282	343	3
CNOT3	5	0.004399	0.018461	0.992282	344	3
CASP14	6	0.0044115	0.019642	0.992282	345	2
DHRS7B	5	0.0044128	0.018509	0.992282	346	4
SEC22A	6	0.0044405	0.019755	0.992282	347	3
TP53TG5	6	0.0044628	0.019839	0.992282	348	4
NPIPA5	5	0.0044654	0.018725	0.992282	349	4
ARID3B	6	0.0044712	0.019876	0.992282	350	3
AHNAK2	5	0.0044919	0.018834	0.992282	351	1
RILPL2	6	0.0044962	0.019965	0.992282	352	3
DHODH	6	0.0045544	0.020179	0.992282	353	5
CLCN1	6	0.0045591	0.020191	0.992282	354	2
FAM50A	6	0.0045593	0.020191	0.992282	355	4
LCE3E	5	0.0045598	0.019099	0.992282	356	4
SBDS	6	0.0045811	0.020271	0.992282	357	4
OR6C6	5	0.0045955	0.019251	0.992282	358	5
RABEP2	5	0.004608	0.019298	0.992282	359	3
OPN3	6	0.004615	0.020395	0.992282	360	3
SLC25A15	6	0.0046374	0.020487	0.992282	361	5
LEF1	6	0.0046619	0.020585	0.992282	362	2
RPL35	6	0.0046635	0.020588	0.992282	363	3
RARG	6	0.0046718	0.020626	0.992282	364	4
ABHD10	6	0.0046995	0.020726	0.992282	365	3
AMIGO1	6	0.0047043	0.020742	0.992282	366	3
OVCH1	5	0.0047139	0.019734	0.992282	367	3
FOXI1	6	0.004716	0.020792	0.992282	368	4
ZNF76	6	0.0047192	0.020803	0.992282	369	4
INO80B	6	0.0047428	0.020876	0.992282	370	5
TLL2	5	0.0047746	0.019966	0.992282	371	5
CGNL1	6	0.0047868	0.021034	0.992282	372	5
MRP63	5	0.0047994	0.020066	0.992282	373	3
C16orf59	6	0.0048093	0.021123	0.992282	374	4
RPS18	6	0.0048139	0.021141	0.992282	375	3
NF1	6	0.0048306	0.021201	0.992282	376	4
CAMK2D	6	0.0048307	0.021201	0.992282	377	3
PRRT3	5	0.0048434	0.020249	0.992282	378	5
LY6H	5	0.004847	0.020263	0.992282	379	5
SRP19	6	0.0048514	0.021282	0.992282	380	5
PENK	6	0.0048889	0.021416	0.992282	381	4
ZIM3	5	0.0049565	0.020703	0.992282	382	1
UTP23	6	0.0049671	0.021682	0.992282	383	4
CDK12	6	0.0049689	0.021689	0.992282	384	3
PDGFB	6	0.0049914	0.021779	0.992282	385	3
OAZ3	6	0.0049968	0.021801	0.992282	386	4
ILK	6	0.0050535	0.022012	0.992282	387	4
PTPN12	5	0.0050834	0.021198	0.992282	388	3
CDK11A	5	0.0050852	0.021204	0.992282	389	5
RAB8A	6	0.0051331	0.022295	0.992282	390	3
MAFA	6	0.0051453	0.022339	0.992282	391	4
QPRT	6	0.0051509	0.022362	0.992282	392	4
ARHGAP32	4	0.0051512	0.017827	0.992282	393	3
RNF148	6	0.0051534	0.022371	0.992282	394	3
PROZ	6	0.005165	0.022417	0.992282	395	2
SPATA32	6	0.0051725	0.022441	0.992282	396	3
NUDT8	6	0.0052157	0.022602	0.992282	397	4
AP5M1	6	0.0052207	0.022619	0.992282	398	3
RBM47	6	0.005232	0.022659	0.992282	399	5
R3HDM4	5	0.0052474	0.021822	0.992282	400	5
ANKS1B	6	0.0052616	0.022754	0.992282	401	5
FAM86B2	6	0.0052828	0.022832	0.992282	402	4
DAB1	4	0.005283	0.018275	0.992282	403	3
HAPLN1	5	0.0052857	0.021962	0.992282	404	5
AKAP9	6	0.0052866	0.022842	0.992282	405	5
FLG2	6	0.0052932	0.022864	0.992282	406	4
TICAM2	4	0.0052987	0.018329	0.992282	407	4
LRBA	6	0.0053007	0.022895	0.992282	408	5
LHX3	6	0.0053315	0.022996	0.992282	409	2
SACS	6	0.0053452	0.023039	0.992282	410	3
PLAGL1	6	0.0053497	0.023057	0.992282	411	5
TSHR	5	0.0053996	0.022431	0.992282	412	5
C1orf35	6	0.0054221	0.023332	0.992282	413	4
CYB5R2	6	0.0054434	0.023404	0.992282	414	4
PTCHD1	5	0.0054673	0.022684	0.992282	415	1
BCAN	6	0.0054714	0.023517	0.992282	416	3
TEX13A	6	0.0054816	0.023552	0.992282	417	5
RNF182	6	0.0054904	0.023588	0.992282	418	5
NCS1	6	0.0054993	0.023619	0.992282	419	2
PLA2G5	5	0.0055008	0.022827	0.992282	420	5
TRIM7	5	0.0055058	0.022847	0.992282	421	3
LPCAT4	6	0.0055081	0.023648	0.992282	422	4
SLIRP	6	0.0055132	0.023668	0.992282	423	2
C16orf93	5	0.0055137	0.022873	0.992282	424	2
PMPCB	6	0.0055159	0.023678	0.992282	425	5
HIP1R	6	0.005555	0.023823	0.992282	426	4
PLXNB3	6	0.00556	0.023839	0.992282	427	5
SNN	6	0.0055629	0.023851	0.992282	428	4
PREPL	5	0.0055748	0.023118	0.992282	429	2
GATSL2	6	0.0055893	0.023941	0.992282	430	5
ZNF282	6	0.0056107	0.024017	0.992282	431	2
EPO	6	0.0056355	0.024096	0.992282	432	5
RFX6	6	0.0056664	0.024206	0.992282	433	2
ZNF284	6	0.0056819	0.024268	0.992282	434	4
ATG4C	5	0.0056859	0.023549	0.992282	435	5
ICMT	6	0.0056873	0.024289	0.992282	436	4
OR6Y1	6	0.0057236	0.024417	0.992282	437	3
PPP1R3F	5	0.0057643	0.023849	0.992282	438	5
MVK	6	0.0057778	0.024614	0.992282	439	4
NKTR	6	0.0058015	0.024701	0.992282	440	3
NPHP4	6	0.0058119	0.024742	0.992282	441	3
MTRR	6	0.0058157	0.024755	0.992282	442	3
GTF2F2	5	0.0058161	0.024057	0.992282	443	5
LBX1	6	0.0058335	0.02481	0.992282	444	3
CHST10	5	0.0058594	0.024226	0.992282	445	4
PKN3	6	0.0058799	0.024974	0.992282	446	4
CCDC117	6	0.0058829	0.024983	0.992282	447	5
CAT	6	0.005903	0.025067	0.992282	448	4
SNRPC	4	0.0059072	0.020334	0.992282	449	4
SOX6	6	0.0059149	0.025106	0.992282	450	5
EHD2	5	0.0059197	0.024466	0.992282	451	5
GSPT2	6	0.0059985	0.025414	0.992282	452	5
CDKN2B	6	0.0059995	0.025417	0.992282	453	4
TIGD2	6	0.0060165	0.025478	0.992282	454	5
UBN2	5	0.0060216	0.024853	0.992282	455	4
PHF19	6	0.0060306	0.025534	0.992282	456	4
HIRIP3	6	0.0060562	0.025628	0.992282	457	3
GTF2IRD2B	6	0.0060808	0.025708	0.992282	458	4
HOXC6	5	0.0061084	0.025189	0.992282	459	2
TMEM179	6	0.0061123	0.025817	0.992282	460	4
EEA1	6	0.0061193	0.025846	0.992282	461	4
SLFN12L	6	0.0061402	0.025921	0.992282	462	5
TNFSF18	6	0.0061474	0.02594	0.992282	463	4
CDH2	6	0.0061555	0.025972	0.992282	464	2
C15orf61	6	0.006157	0.025976	0.992282	465	5
ENAH	6	0.0061629	0.026	0.992282	466	4
PPAPDC1A	6	0.0061636	0.026005	0.992282	467	2
UNC13A	6	0.0061637	0.026005	0.992282	468	5
TBC1D9B	6	0.0061675	0.026014	0.992282	469	3
ZSCAN21	6	0.0061824	0.026064	0.992282	470	3
FBXO31	6	0.0061931	0.026099	0.992282	471	3
FAM172A	6	0.0062216	0.026206	0.992282	472	5
ICAM2	6	0.0062232	0.026214	0.992282	473	4
SYCP1	5	0.0062563	0.025734	0.992282	474	3
BBC3	6	0.0062615	0.026351	0.992282	475	3
SMG7	6	0.0062789	0.026414	0.992282	476	2
SRP9	6	0.0062794	0.026414	0.992282	477	3
SRFBP1	6	0.0062848	0.026431	0.992282	478	3
ZNF524	6	0.0062986	0.026484	0.992282	479	5
GNLY	6	0.0063193	0.02657	0.992282	480	4
C14orf39	6	0.0063452	0.026669	0.992282	481	4
ZBTB17	5	0.006376	0.026172	0.992282	482	3
SPCS1	6	0.0063827	0.026814	0.992282	483	5
MYLK2	6	0.0063902	0.026848	0.992282	484	3
TEX38	6	0.0064043	0.026898	0.992282	485	3
PHRF1	5	0.0064419	0.026411	0.992282	486	2
SGSM1	6	0.0064458	0.027055	0.992282	487	3
CCDC19	6	0.0065064	0.027284	0.992282	488	4
PF4	5	0.0065126	0.026696	0.992282	489	3
MEP1A	6	0.0065249	0.027347	0.992282	490	5
XPOT	5	0.0065269	0.026746	0.992282	491	3
SSR2	6	0.0065786	0.027545	0.992282	492	3
C10orf68	6	0.0066063	0.027635	0.992282	493	5
ACYP2	6	0.0066477	0.027774	0.992282	494	3
CCDC23	6	0.0066578	0.027808	0.992282	495	4
ERI1	6	0.0066685	0.027842	0.992282	496	1
SF3B3	6	0.0066813	0.027887	0.992282	497	3
KIAA1524	6	0.0066995	0.027949	0.992282	498	5
NOTCH4	6	0.0067241	0.02803	0.992282	499	2
A4GNT	6	0.0067306	0.028056	0.992282	500	5
CHIA	4	0.0067377	0.023067	0.992282	501	3
DEDD2	6	0.0067766	0.028239	0.992282	502	5
CBFA2T3	6	0.0067797	0.028248	0.992282	503	3
MMP1	6	0.0067936	0.028293	0.992282	504	5
CA13	6	0.0067997	0.028318	0.992282	505	5
CDH20	6	0.0068354	0.028435	0.992282	506	2
ZNF234	6	0.006848	0.028479	0.992282	507	4
SLC25A26	6	0.0068603	0.028522	0.992282	508	4
RGR	5	0.006873	0.02791	0.992282	509	4
JUNB	6	0.006891	0.028636	0.992282	510	2
SIAE	6	0.0068968	0.028657	0.992282	511	4
HIST1H2AA	6	0.0069101	0.028705	0.992282	512	2
TMEM116	6	0.0069185	0.028735	0.992282	513	3
CAMK2A	5	0.0069421	0.028101	0.992282	514	3
C2CD5	6	0.0069554	0.028868	0.992282	515	2
MUM1L1	6	0.0070002	0.029019	0.992282	516	3
SGPP1	6	0.0070008	0.02902	0.992282	517	3
ZNF445	6	0.0070228	0.0291	0.992282	518	4
GRHPR	6	0.0070579	0.029233	0.992282	519	2
SHH	6	0.0070693	0.029268	0.992282	520	4
OSBPL8	5	0.0070912	0.028523	0.992282	521	3
AGBL4	6	0.0071136	0.029419	0.992282	522	3
GABRG3	6	0.0071323	0.029493	0.992282	523	4
TMEM211	6	0.0071381	0.029514	0.992282	524	3
BAMBI	6	0.0071558	0.029578	0.992282	525	5
LRRC7	6	0.0071692	0.029618	0.992282	526	2
ZNF483	6	0.0071783	0.029649	0.992282	527	3
GPR87	6	0.0071929	0.029702	0.992282	528	4
CYB5D1	6	0.0071956	0.029709	0.992282	529	2
DSG3	6	0.0072219	0.029806	0.992282	530	5
CYP46A1	6	0.0072248	0.029818	0.992282	531	2
RIMKLB	6	0.0072418	0.029882	0.992282	532	4
TMEM175	6	0.0072479	0.029906	0.992282	533	5
CCDC111	6	0.007333	0.030207	0.992282	534	5
ZMYM6NB	6	0.007336	0.03022	0.992282	535	2
TOM1L2	5	0.0073436	0.029218	0.992282	536	4
MAMSTR	6	0.0073475	0.03025	0.992282	537	4
CHST2	6	0.0073602	0.030293	0.992282	538	5
NUBP1	6	0.0073705	0.030331	0.992282	539	4
ORC3	6	0.0073917	0.03042	0.992282	540	3
SGPP2	6	0.0074075	0.030481	0.992282	541	3
FLJ25363	6	0.0074231	0.030541	0.992282	542	5
TROVE2	6	0.0074338	0.030583	0.992282	543	4
NOP14	6	0.0074434	0.030612	0.992282	544	3
MAOB	6	0.0074473	0.030625	0.992282	545	3
CELA1	6	0.0074579	0.03067	0.992282	546	5
ZSWIM1	5	0.0074579	0.029552	0.992282	547	4
MFAP5	6	0.0074836	0.030746	0.992282	548	2
HIST1H2AG	6	0.0075042	0.030828	0.992282	549	3
TTC18	6	0.0075249	0.030903	0.992282	550	5
PHLDA2	5	0.007547	0.029813	0.992282	551	3
GCM1	5	0.0075548	0.029832	0.992282	552	1
ESF1	6	0.0075585	0.031031	0.992282	553	3
LY96	6	0.0075655	0.031053	0.992282	554	5
SPATA4	6	0.0075823	0.031111	0.992282	555	5
GALNT7	6	0.0076117	0.031215	0.992282	556	5
C15orf57	6	0.0076133	0.03122	0.992282	557	4
ZNF300	5	0.0076206	0.03001	0.992282	558	3
IFT74	6	0.0076231	0.031265	0.992282	559	5
NDUFA11	6	0.0076265	0.031276	0.992282	560	5
SYPL1	6	0.0076321	0.031295	0.992282	561	5
AGA	6	0.0076429	0.031334	0.992282	562	4
ROR1	6	0.0076489	0.031354	0.992282	563	2
MAGEC1	6	0.0076697	0.031432	0.992282	564	3
NEIL1	6	0.007708	0.03156	0.992282	565	4
TOR1AIP1	6	0.0077355	0.03166	0.992282	566	5
KLHL22	5	0.0077402	0.030366	0.992282	567	4
KTN1	6	0.00775	0.031711	0.992282	568	5
SLC17A5	5	0.0077561	0.030406	0.992282	569	4
NCF4	6	0.0077769	0.031807	0.992282	570	4
C19orf47	6	0.0077809	0.031821	0.992282	571	4
ZNF573	6	0.0077904	0.031848	0.992282	572	5
PIP5KL1	5	0.0078277	0.030604	0.992282	573	3
ZNF534	6	0.0078365	0.032013	0.992282	574	1
PMS2	6	0.0078544	0.032077	0.992282	575	3
QDPR	5	0.0078693	0.030725	0.992282	576	4
RNASE2	5	0.0078889	0.030785	0.992282	577	3
UBE2E3	6	0.0078921	0.03221	0.992282	578	2
SPP1	6	0.0079308	0.032339	0.992282	579	5
FAM127B	6	0.0079376	0.032365	0.992282	580	5
DNAJC1	6	0.0079391	0.032372	0.992282	581	4
SPEN	6	0.0079462	0.032397	0.992282	582	4
VSX1	6	0.0079477	0.032406	0.992282	583	1
NUP133	6	0.0079753	0.032512	0.992282	584	3
CLEC18A	3	0.0079859	0.021633	0.992282	585	2
MPC1	6	0.0080032	0.03261	0.992282	586	2
GJC1	6	0.0080588	0.032793	0.992282	587	3
WBP1	6	0.0080663	0.032826	0.992282	588	4
FANCC	6	0.0081144	0.032998	0.992282	589	2
PTPN18	6	0.0081261	0.033049	0.992282	590	4
CREB3L2	6	0.0081311	0.033069	0.992282	591	5
THAP8	6	0.0081469	0.033119	0.992282	592	5
PLAG1	5	0.0081572	0.031564	0.992282	593	3
GNB3	4	0.0081635	0.027558	0.992282	594	1
EDEM2	6	0.0081645	0.033174	0.992282	595	3
CFDP1	6	0.00817	0.033195	0.992282	596	4
CLDN22	6	0.0081742	0.03321	0.992282	597	4
STAT2	6	0.008262	0.033511	0.992282	598	3
TM4SF4	6	0.0083354	0.033752	0.992282	599	4
ST6GAL1	6	0.0083367	0.033758	0.992282	600	3
TRAPPC6B	6	0.0083369	0.033759	0.992282	601	4
DPYS	6	0.0083637	0.033853	0.992282	602	3
ZNF737	5	0.0083745	0.032205	0.992282	603	3
STX6	6	0.0083923	0.033961	0.992282	604	2
PNPLA7	6	0.0084427	0.034138	0.992282	605	5
TNNI2	6	0.0084478	0.034153	0.992282	606	3
DCSTAMP	6	0.0084536	0.034173	0.992282	607	3
KRTAP3-1	6	0.0084598	0.034198	0.992282	608	3
NCSTN	5	0.0084712	0.032489	0.992282	609	4
CDC25B	6	0.0084863	0.034273	0.992282	610	4
CEP57L1	6	0.0085158	0.03439	0.992282	611	5
OR52N5	6	0.0085467	0.034494	0.992282	612	5
GADD45GIP1	5	0.0085582	0.032735	0.992282	613	4
SLITRK5	6	0.008559	0.034537	0.992282	614	2
ENY2	5	0.0085737	0.032781	0.992282	615	2
APOD	6	0.0086685	0.034926	0.992282	616	3
SCAF1	6	0.0087167	0.035089	0.992282	617	5
PLK1S1	6	0.0087256	0.035119	0.992282	618	4
CSRP3	6	0.0087641	0.035247	0.992282	619	5
LRRC24	4	0.0087737	0.02956	0.992282	620	4
MKI67	6	0.0087812	0.035297	0.992282	621	4
FLJ22184	5	0.0087885	0.033377	0.992282	622	4
B3GNT1	6	0.008805	0.035371	0.992282	623	2
C3orf30	6	0.0088084	0.035383	0.992282	624	5
CD274	6	0.0088102	0.035392	0.992282	625	4
LOC100133267	6	0.0088352	0.035461	0.992282	626	4
ANGPTL5	6	0.0088367	0.035467	0.992282	627	2
VASH1	6	0.0088673	0.035576	0.992282	628	3
FHL5	6	0.0088923	0.035671	0.992282	629	2
OR2AG1	5	0.00891	0.033713	0.992282	630	4
FAM156B	6	0.0089439	0.035847	0.992282	631	4
UBASH3B	6	0.0089478	0.035861	0.992282	632	3
PDX1	5	0.008997	0.033955	0.992282	633	3
C8orf48	6	0.0090182	0.036116	0.992282	634	3
GNG7	6	0.0090276	0.036151	0.992282	635	4
LOC440335	6	0.0091144	0.036438	0.992282	636	3
ZNF365	6	0.0091482	0.036549	0.992282	637	4
ZNF311	6	0.00917	0.036619	0.992282	638	4
ECM1	6	0.0091795	0.036646	0.992282	639	4
APC2	5	0.0091982	0.034525	0.992282	640	4
HSD17B7	6	0.009247	0.036875	0.992282	641	2
PRKAA2	6	0.0093086	0.037096	0.992282	642	3
ZNF672	6	0.0093119	0.037105	0.992282	643	2
ZMIZ1	6	0.0093365	0.037196	0.992282	644	3
PLXDC1	6	0.0093576	0.03728	0.992282	645	5
TRIM64C	6	0.0093848	0.037382	0.992282	646	5
DNAJB6	6	0.0093884	0.037392	0.992282	647	5
OR52N4	6	0.0093901	0.037399	0.992282	648	4
SIGLEC14	6	0.0093921	0.037407	0.992282	649	4
L1TD1	6	0.0094018	0.037439	0.992282	650	5
ARHGAP23	6	0.0094047	0.03745	0.992282	651	3
HNRNPA1	6	0.0094195	0.037497	0.992282	652	3
SOX10	6	0.0094216	0.037503	0.992282	653	5
GINS1	6	0.0094463	0.037582	0.992282	654	3
MMP21	6	0.0094476	0.037586	0.992282	655	3
NRK	6	0.0094567	0.037618	0.992282	656	3
TTF1	6	0.0094686	0.037656	0.992282	657	2
FUNDC1	6	0.0095031	0.037781	0.992282	658	4
NDST1	6	0.0095586	0.037964	0.992282	659	3
YEATS4	6	0.0095704	0.038	0.992282	660	5
HLA-DMB	6	0.0096062	0.038135	0.992282	661	4
RGPD8	6	0.0096092	0.038147	0.992282	662	3
RPRD2	6	0.0096147	0.038163	0.992282	663	4
RTF1	6	0.0096258	0.038206	0.992282	664	4
HOXB4	6	0.0096462	0.038287	0.992282	665	4
GRPEL1	6	0.0096696	0.038364	0.992282	666	4
TRAPPC3L	5	0.0096803	0.035952	0.992282	667	4
TBC1D1	6	0.0097251	0.038563	0.992282	668	1
EEFSEC	6	0.0097253	0.038563	0.992282	669	5
MLX	6	0.0097282	0.038573	0.992282	670	5
RPL15	6	0.009736	0.038607	0.992282	671	4
PSMD12	6	0.0097376	0.038614	0.992282	672	5
SLC26A7	6	0.0097588	0.038683	0.992282	673	2
MUC12	6	0.0098054	0.038851	0.992282	674	3
OR5K3	6	0.0098207	0.038904	0.992282	675	5
HLCS	6	0.0098361	0.038968	0.992282	676	3
TIMM22	6	0.0098414	0.038997	0.992282	677	5
PPP1CA	6	0.0098668	0.039089	0.992282	678	3
PRKCD	5	0.0098701	0.036498	0.992282	679	2
TNP1	6	0.0098741	0.039117	0.992282	680	5
PDE12	6	0.0098916	0.039179	0.992282	681	3
HGFAC	6	0.0098943	0.039188	0.992282	682	5
TMEM88	5	0.0099292	0.036666	0.992282	683	3
ACOT9	6	0.0099471	0.039361	0.992282	684	3
SMIM22	6	0.0099536	0.039382	0.992282	685	4
HOMER3	5	0.009984	0.036827	0.992282	686	4
KIAA0947	6	0.01	0.039552	0.992282	687	5
NAA15	6	0.010005	0.039568	0.992282	688	4
KNSTRN	6	0.010013	0.039595	0.992282	689	4
SHISA7	6	0.010031	0.039649	0.992282	690	3
ZNF781	6	0.010035	0.039663	0.992282	691	5
GRPR	6	0.01004	0.039672	0.992282	692	2
PHYH	5	0.010055	0.037026	0.992282	693	3
KIAA0408	6	0.010058	0.039732	0.992282	694	4
MAPKAPK5	6	0.010077	0.039799	0.992282	695	4
ACCSL	6	0.010077	0.039799	0.992282	696	4
RHOA	6	0.010104	0.039896	0.992282	697	3
GBF1	6	0.010106	0.039902	0.992282	698	4
QTRTD1	6	0.010114	0.039933	0.992282	699	3
USP9Y	6	0.010118	0.039944	0.992282	700	4
EXOC3L1	6	0.010148	0.040048	0.992282	701	3
HSCB	6	0.01019	0.040187	0.992282	702	5
FGD6	6	0.010222	0.040286	0.992282	703	4
GNG10	6	0.010225	0.040292	0.992282	704	2
POU2F1	5	0.010293	0.037719	0.992282	705	3
EPB42	6	0.010316	0.040588	0.992282	706	4
TERF2IP	6	0.010322	0.040606	0.992282	707	4
L3HYPDH	6	0.010335	0.040657	0.992282	708	4
XKR8	6	0.010336	0.040659	0.992282	709	2
KIF22	6	0.010351	0.040719	0.992282	710	5
HS3ST5	5	0.01036	0.037904	0.992282	711	3
RASAL2	6	0.010446	0.041057	0.992282	712	3
PSD4	6	0.010463	0.041103	0.992282	713	4
DBNDD1	6	0.010493	0.041208	0.992282	714	4
ITPRIPL2	6	0.010499	0.04123	0.992282	715	4
LSM6	6	0.010502	0.041245	0.992282	716	4
PLEKHA5	5	0.010534	0.038417	0.992282	717	4
PPP3CB	6	0.010609	0.041599	0.992282	718	4
MAP3K7	6	0.010613	0.041609	0.992282	719	3
C11orf96	5	0.010615	0.038638	0.992282	720	4
HSPH1	6	0.010648	0.041736	0.992282	721	4
ARNT2	6	0.010668	0.041808	0.992282	722	3
CXCL5	5	0.010685	0.038821	0.992282	723	3
SUPT5H	5	0.010713	0.038894	0.992282	724	4
HSPB9	6	0.010734	0.042033	0.992282	725	5
PARP9	6	0.010748	0.042082	0.992282	726	5
RAG2	5	0.010749	0.038996	0.992282	727	3
PGK2	6	0.010758	0.042114	0.992282	728	3
SKAP1	6	0.010779	0.042176	0.992282	729	1
P2RY13	6	0.010782	0.042186	0.992282	730	5
GSTM3	6	0.010803	0.042255	0.992282	731	3
GUCA2A	5	0.010821	0.039199	0.992282	732	3
CLCN7	5	0.010834	0.039229	0.992282	733	3
CCDC50	6	0.010835	0.042361	0.992282	734	5
PARP14	6	0.010851	0.042409	0.992282	735	5
SDAD1	6	0.010861	0.042442	0.992282	736	3
STATH	6	0.010867	0.04246	0.992282	737	5
LANCL3	6	0.010872	0.042473	0.992282	738	5
MYL7	6	0.01089	0.042531	0.992282	739	2
HSPA5	6	0.010904	0.042576	0.992282	740	5
CYTH4	6	0.010924	0.042636	0.992282	741	4
PPP2R3B_Y	6	0.01093	0.042659	0.992282	742	5
MATN1	6	0.010946	0.042711	0.992282	743	2
RHOXF1	6	0.010946	0.042711	0.992282	744	4
KCNH6	5	0.010948	0.039564	0.992282	745	3
SYN2	6	0.010963	0.042761	0.992282	746	4
TSC1	6	0.010965	0.042767	0.992282	747	4
FSD2	6	0.010992	0.042855	0.992282	748	4
FOXD4	6	0.011001	0.042891	0.992282	749	4
ABCA3	6	0.011009	0.042921	0.992282	750	2
WDTC1	6	0.011022	0.042968	0.992282	751	5
MSH3	5	0.011023	0.039805	0.992282	752	4
DBNDD2	6	0.011023	0.042972	0.992282	753	4
LIME1	6	0.011037	0.043017	0.992282	754	5
SPDYE4	6	0.011041	0.043031	0.992282	755	3
SSH1	6	0.011051	0.043062	0.992282	756	4
RHNO1	6	0.011051	0.043062	0.992282	757	4
BCAP31	6	0.011057	0.043079	0.992282	758	1
NHLH2	6	0.011068	0.043121	0.992282	759	4
ALOX12	6	0.011112	0.043288	0.992282	760	2
RPS6KC1	5	0.011165	0.040225	0.992282	761	3
LINGO4	6	0.011167	0.043485	0.992282	762	3
RGS8	6	0.011182	0.043533	0.992282	763	4
RGS4	5	0.011192	0.040299	0.992282	764	3
VCAM1	6	0.011193	0.043568	0.992282	765	3
TFAP2D	6	0.011221	0.04367	0.992282	766	3
HNRNPL	6	0.011223	0.043676	0.992282	767	2
TIGD6	5	0.011234	0.040407	0.992282	768	3
E2F4	6	0.011306	0.043959	0.992282	769	2
FAP	4	0.011307	0.037543	0.992282	770	4
ODF2L	5	0.011329	0.040674	0.992282	771	3
CEPT1	6	0.011334	0.044062	0.992282	772	4
ZNF324	6	0.011357	0.044138	0.992282	773	4
PLK1	6	0.011365	0.044163	0.992282	774	5
FTSJD1	5	0.011366	0.040776	0.992282	775	2
CRMP1	6	0.011389	0.044243	0.992282	776	1
PTAR1	6	0.011406	0.044302	0.992282	777	3
RAB18	5	0.011413	0.040907	0.992282	778	4
MRO	6	0.011424	0.044364	0.992282	779	5
LOC643802	6	0.011445	0.044424	0.992282	780	2
BTK	6	0.011484	0.044558	0.992282	781	4
LOC100289561	6	0.011491	0.044579	0.992282	782	4
ECE1	6	0.011499	0.044604	0.992282	783	3
SLC16A10	6	0.0115	0.044609	0.992282	784	2
ATP6V1A	5	0.011501	0.041169	0.992282	785	2
SEC11A	6	0.011513	0.04465	0.992282	786	4
BYSL	4	0.011515	0.038175	0.992282	787	1
CNPY3	6	0.01152	0.044676	0.992282	788	3
P4HA2	5	0.01153	0.041246	0.992282	789	3
MAP2K5	6	0.011555	0.044801	0.992282	790	4
SENP7	6	0.011555	0.044802	0.992282	791	2
AP1S2	6	0.011567	0.044849	0.992282	792	4
RTP1	6	0.011611	0.045003	0.992282	793	1
FAM90A1	6	0.011614	0.045012	0.992282	794	4
ADAM8	5	0.011627	0.041514	0.992282	795	4
FAM73A	6	0.011671	0.045209	0.992282	796	4
ABCG5	6	0.011711	0.045336	0.992282	797	5
MCC	6	0.011722	0.045369	0.992282	798	1
ANAPC10	6	0.011739	0.045433	0.992282	799	5
SPAG16	6	0.011777	0.045557	0.992282	800	4
SCN9A	6	0.011787	0.045592	0.992282	801	3
CTDNEP1	5	0.011812	0.042044	0.992282	802	4
CMSS1	6	0.011812	0.045675	0.992282	803	3
SNAP23	6	0.01182	0.045704	0.992282	804	4
TCF23	5	0.011838	0.042124	0.992282	805	4
TTK	6	0.011883	0.045912	0.992282	806	4
SPATC1	6	0.011883	0.045912	0.992282	807	3
C1orf51	6	0.011888	0.045928	0.992282	808	2
PAK6	6	0.011893	0.045948	0.992282	809	4
OR2V2	6	0.011943	0.046107	0.992282	810	3
TMEM70	6	0.011958	0.04615	0.992282	811	3
AGMAT	6	0.011977	0.046217	0.992282	812	3
PAFAH1B1	4	0.011979	0.039615	0.992282	813	4
TTC30B	6	0.012026	0.046382	0.992282	814	5
UBA52	6	0.012043	0.046439	0.992282	815	4
PPP6R3	6	0.012064	0.046513	0.992282	816	4
FAM126A	5	0.012089	0.042848	0.992282	817	4
DUSP28	6	0.012109	0.046673	0.992282	818	1
SLC24A2	6	0.01215	0.046808	0.992282	819	4
TMEM62	6	0.012161	0.04684	0.992282	820	5
SHKBP1	5	0.012181	0.043104	0.992282	821	2
PEX6	6	0.012192	0.04694	0.992282	822	2
CUTC	5	0.012201	0.043155	0.992282	823	4
TGM3	6	0.012213	0.047014	0.992282	824	5
PLEKHF1	6	0.012258	0.047165	0.992282	825	3
GDAP1L1	6	0.012273	0.047219	0.992282	826	3
NDUFAF6	6	0.012276	0.047228	0.992282	827	4
AGO1	6	0.012331	0.04741	0.992282	828	2
TKTL1	6	0.012342	0.047452	0.992282	829	4
GP6	6	0.01236	0.047503	0.992282	830	5
HIST2H2BF	5	0.01238	0.043673	0.992282	831	4
TM4SF5	6	0.012386	0.047589	0.992282	832	3
ATP2C2	6	0.012414	0.047689	0.992282	833	5
NCK1	6	0.012414	0.047689	0.992282	834	3
NDNF	6	0.012435	0.047761	0.992282	835	4
CMTM5	6	0.012442	0.047786	0.992282	836	1
MGAT4A	6	0.012455	0.047833	0.992282	837	5
SLU7	6	0.012475	0.047903	0.992282	838	5
ALG13	6	0.01248	0.047923	0.992282	839	4
SLC25A1	6	0.01248	0.047926	0.992282	840	5
NRBP1	5	0.012481	0.043963	0.992282	841	3
POLRMT	4	0.012488	0.041205	0.992282	842	4
MTSS1	6	0.012497	0.047976	0.992282	843	3
GLTSCR1	5	0.01251	0.044045	0.992282	844	3
PPP4R4	6	0.012524	0.048068	0.992282	845	4
MAN1C1	6	0.012548	0.048155	0.992282	846	4
EFS	5	0.012553	0.04415	0.992282	847	4
GSTA3	6	0.012565	0.048214	0.992282	848	5
VIMP	6	0.012569	0.048228	0.992282	849	4
LPAR1	6	0.01258	0.048269	0.992282	850	1
SS18L1	6	0.01258	0.048269	0.992282	851	2
ARID5B	6	0.012589	0.048296	0.992282	852	4
ALOX15	6	0.012596	0.048323	0.992282	853	2
RNASE3	6	0.012624	0.048423	0.992282	854	4
TRIM26	5	0.012637	0.044398	0.992282	855	4
WASH1	6	0.012638	0.04848	0.992282	856	5
KSR1	6	0.012641	0.048486	0.992282	857	3
KIAA1456	6	0.012663	0.048568	0.992282	858	2
TRAF3IP2	6	0.012673	0.0486	0.992282	859	5
UGT3A2	6	0.012704	0.048706	0.992282	860	5
TMEM98	6	0.012719	0.048761	0.992282	861	3
C7orf31	6	0.012727	0.048793	0.992282	862	4
KLHL41	5	0.01273	0.044655	0.992282	863	4
PHYHD1	5	0.012735	0.044665	0.992282	864	2
2020-03-09	5	0.012781	0.04479	0.992282	865	3
MNT	6	0.012783	0.048975	0.992282	866	4
DHCR7	6	0.012795	0.049013	0.992282	867	3
CDCA5	6	0.012823	0.049108	0.992282	868	5
DMRT2	5	0.012824	0.044911	0.992282	869	2
DIRC1	6	0.01294	0.049505	0.992282	870	2
ZNF517	5	0.012966	0.04532	0.992282	871	2
CNPY1	6	0.013003	0.049711	0.992282	872	3
NDNL2	6	0.013015	0.049748	0.992282	873	3
LOC100131094	5	0.013036	0.045506	0.992282	874	3
FICD	5	0.013053	0.045552	0.992282	875	4
RHBDL2	6	0.013055	0.049882	0.992282	876	5
ARSF	5	0.013104	0.045683	0.992282	877	4
MYBBP1A	6	0.013161	0.050229	0.992282	878	2
PANK2	6	0.013187	0.05031	0.992282	879	5
CUL3	6	0.013187	0.05031	0.992282	880	5
FXR1	5	0.013229	0.046052	0.992282	881	4
SOCS5	6	0.013249	0.050512	0.992282	882	5
GGTLC2	6	0.013252	0.050519	0.992282	883	5
KLHL9	6	0.013261	0.05055	0.992282	884	4
GLT6D1	6	0.013272	0.050583	0.992282	885	3
NBL1	6	0.013272	0.050585	0.992282	886	3
IQCK	6	0.013279	0.050613	0.992282	887	4
SVOP	6	0.013301	0.050679	0.992282	888	5
TEKT4	6	0.013327	0.050756	0.992282	889	2
DHPS	5	0.013336	0.046334	0.992282	890	2
SLC7A9	5	0.013342	0.046352	0.992282	891	2
DTX4	6	0.013365	0.050875	0.992282	892	3
FAM91A1	6	0.013366	0.05088	0.992282	893	4
KRTCAP2	6	0.013426	0.051077	0.992282	894	4
RSRC2	6	0.01343	0.051085	0.992282	895	3
DYNC2LI1	6	0.013448	0.051149	0.992282	896	4
ZFAND5	5	0.013462	0.046685	0.992282	897	3
OR2T33	6	0.013466	0.051212	0.992282	898	3
MLL	6	0.01348	0.051248	0.992282	899	3
GLCE	6	0.013519	0.051377	0.992282	900	3
PIR	6	0.013537	0.05144	0.992282	901	5
USP45	6	0.013549	0.05148	0.992282	902	2
DEFB107B	5	0.013583	0.047015	0.992282	903	2
DEPDC1	6	0.013598	0.051651	0.992282	904	4
PHACTR2	6	0.013604	0.051673	0.992282	905	1
SGK223	6	0.013609	0.051691	0.992282	906	3
CEP250	5	0.013612	0.047088	0.992282	907	3
CLSTN1	6	0.013638	0.051779	0.992282	908	4
SLC10A2	6	0.013639	0.051782	0.992282	909	5
GOLPH3L	6	0.013659	0.051843	0.992282	910	4
NIPA2	6	0.013659	0.051845	0.992282	911	1
AGR2	6	0.013687	0.051943	0.992282	912	5
XYLT1	5	0.013709	0.047369	0.992282	913	3
FAM181A	6	0.013712	0.052011	0.992282	914	5
CNOT10	6	0.013715	0.052025	0.992282	915	3
ERCC1	6	0.013733	0.052073	0.992282	916	4
A2M	6	0.013747	0.052125	0.992282	917	4
TBC1D3F	4	0.013749	0.045038	0.992282	918	3
S100A1	6	0.013758	0.052157	0.992282	919	4
EVPLL	6	0.01377	0.052203	0.992282	920	2
PDE6C	6	0.013779	0.052226	0.992282	921	4
LGALS1	6	0.013787	0.052254	0.992282	922	5
CLIC6	6	0.013794	0.052279	0.992282	923	2
BEND2	5	0.013796	0.047644	0.992282	924	2
SLIT2	3	0.013836	0.036405	0.992282	925	2
TSG101	5	0.013856	0.047799	0.992282	926	4
CBLL1	5	0.013879	0.04787	0.992282	927	4
RIT2	6	0.013881	0.052556	0.992282	928	2
PRDX2	5	0.01389	0.047893	0.992282	929	3
FBXO41	6	0.013895	0.052603	0.992282	930	4
PIDD	6	0.013942	0.052772	0.992282	931	3
ZNF362	6	0.013949	0.052793	0.992282	932	4
USP33	6	0.013949	0.052793	0.992282	933	4
BBS12	5	0.013952	0.048054	0.992282	934	3
MX2	5	0.013974	0.04812	0.992282	935	4
KDM6A	6	0.013977	0.052879	0.992282	936	3
PKNOX1	6	0.013981	0.05289	0.992282	937	5
TAF12	6	0.014001	0.052956	0.992282	938	4
LRCOL1	6	0.014011	0.052985	0.992282	939	5
GHITM	6	0.014035	0.053066	0.992282	940	5
POR	6	0.014044	0.053091	0.992282	941	4
LOR	6	0.014047	0.0531	0.992282	942	3
MOG	4	0.014053	0.045993	0.992282	943	3
GORAB	6	0.014056	0.053127	0.992282	944	4
CENPH	3	0.014063	0.036973	0.992282	945	3
ZNF681	6	0.014066	0.053163	0.992282	946	3
TSC22D2	6	0.014115	0.053301	0.992282	947	3
RRNAD1	6	0.014158	0.053442	0.992282	948	4
HSPA1A	6	0.01419	0.053554	0.992282	949	5
FBXL17	5	0.014211	0.048771	0.992282	950	2
OPA1	6	0.014213	0.053633	0.992282	951	4
HMGCLL1	6	0.014221	0.05366	0.992282	952	3
ANGPT2	6	0.014241	0.053719	0.992282	953	3
CCL19	6	0.014297	0.053907	0.992282	954	3
MCU	6	0.01432	0.053982	0.992282	955	3
EPHX4	6	0.014323	0.053998	0.992282	956	2
TBC1D10A	6	0.014328	0.054015	0.992282	957	2
MLLT3	6	0.014351	0.054101	0.992282	958	3
KCNK4	6	0.014359	0.054129	0.992282	959	2
LMBRD1	6	0.014422	0.054343	0.992282	960	4
TIMM17B	6	0.014434	0.054382	0.992282	961	3
LUC7L3	6	0.014439	0.054398	0.992282	962	5
PCDHB13	6	0.014447	0.054422	0.992282	963	4
FSIP2	6	0.014458	0.054457	0.992282	964	5
SPRR4	6	0.014466	0.054483	0.992282	965	5
SNRPB2	6	0.014493	0.054578	0.992282	966	3
LRRC57	5	0.014499	0.049564	0.992282	967	3
B9D1	5	0.014534	0.04966	0.992282	968	3
CHAF1A	6	0.014544	0.054749	0.992282	969	2
LCN2	6	0.014545	0.054751	0.992282	970	3
OR7C1	6	0.01456	0.054805	0.992282	971	4
DMBT1	6	0.014602	0.054941	0.992282	972	4
VARS	6	0.014605	0.054952	0.992282	973	3
COLEC11	4	0.014649	0.047837	0.992282	974	4
TPT1	6	0.014655	0.055124	0.992282	975	3
C14orf142	5	0.014672	0.050036	0.992282	976	2
LOC643355	5	0.014676	0.050045	0.992282	977	3
LPIN1	6	0.014694	0.055255	0.992282	978	3
LMBR1	6	0.01471	0.055305	0.992282	979	3
WNT6	6	0.01471	0.055305	0.992282	980	2
KLHL42	6	0.014726	0.055361	0.992282	981	4
TTLL11	6	0.014742	0.055411	0.992282	982	3
IFI27L1	6	0.014742	0.055411	0.992282	983	3
ZNF408	5	0.014752	0.050252	0.992282	984	3
TMEM86B	6	0.014756	0.055458	0.992282	985	5
C7	6	0.014765	0.05549	0.992282	986	3
DUSP9	6	0.014794	0.055592	0.992282	987	3
CLEC4F	6	0.014819	0.055672	0.992282	988	5
TUBB4B	6	0.014821	0.055681	0.992282	989	2
PLG	6	0.014888	0.055904	0.992282	990	5
TUBE1	6	0.014931	0.05604	0.992282	991	3
CRELD2	5	0.014934	0.050769	0.992282	992	2
VWA2	6	0.014935	0.056051	0.992282	993	3
CTPS2	6	0.014992	0.056236	0.992282	994	3
ZNF174	6	0.015002	0.056269	0.992282	995	5
SIRPB1	5	0.015007	0.050972	0.992282	996	3
INTS7	6	0.015019	0.056321	0.992282	997	5
KRTAP3-3	5	0.015037	0.051055	0.992282	998	4
PSMC4	6	0.015042	0.056409	0.992282	999	2
NOL3	6	0.015055	0.056451	0.992282	1000	5
SURF4	6	0.015097	0.056586	0.992282	1001	2
PCYOX1	6	0.015127	0.056678	0.992282	1002	4
HIST1H3E	6	0.015152	0.056775	0.992282	1003	3
FERMT3	5	0.01516	0.051394	0.992282	1004	4
APBA1	6	0.015207	0.056952	0.992282	1005	2
KRTAP5-3	5	0.015209	0.051538	0.992282	1006	4
SERTAD4	4	0.015242	0.049669	0.992282	1007	3
COX6B2	4	0.0153	0.049849	0.992282	1008	1
ARSK	6	0.015305	0.057239	0.992282	1009	5
HDDC2	6	0.015318	0.057272	0.992282	1010	3
CHRDL2	6	0.015325	0.057292	0.992282	1011	4
ANAPC2	5	0.015358	0.051956	0.992282	1012	3
ZNF543	6	0.015373	0.057447	0.992282	1013	1
GPR125	6	0.015406	0.057546	0.992282	1014	4
APP	6	0.015428	0.057622	0.992282	1015	4
ITFG1	6	0.015439	0.057658	0.992282	1016	3
NAPEPLD	6	0.01545	0.057694	0.992282	1017	3
SYF2	6	0.015484	0.057807	0.992282	1018	2
ARHGDIG	6	0.015488	0.057824	0.992282	1019	4
ELOVL6	6	0.015513	0.057906	0.992282	1020	5
MAGI1	5	0.015523	0.052422	0.992282	1021	4
PRR22	6	0.015527	0.057958	0.992282	1022	5
OR1A1	6	0.015569	0.058092	0.992282	1023	3
OR11H2	6	0.015594	0.058164	0.992282	1024	3
OVOL2	6	0.015653	0.05835	0.992282	1025	5
TMEM51	6	0.015695	0.058478	0.992282	1026	3
KIAA0319L	6	0.015721	0.058557	0.992282	1027	4
CD300LD	5	0.015732	0.053013	0.992282	1028	3
EVX1	6	0.015741	0.058623	0.992282	1029	3
STK31	6	0.01576	0.058695	0.992282	1030	3
RUNDC1	6	0.015793	0.058801	0.992282	1031	2
GPR82	6	0.015815	0.058866	0.992282	1032	1
SNTN	6	0.015841	0.058943	0.992282	1033	4
CAPN2	6	0.015847	0.058964	0.992282	1034	3
FAM196B	6	0.01587	0.059035	0.992282	1035	4
NAT8	5	0.015881	0.053433	0.992282	1036	4
SMNDC1	5	0.015914	0.05352	0.992282	1037	2
SULT1A3	4	0.015917	0.051785	0.992282	1038	3
TSPAN18	6	0.015925	0.059229	0.992282	1039	3
LACTB	6	0.015952	0.059313	0.992282	1040	4
C1QL2	5	0.015975	0.053689	0.992282	1041	3
BRSK1	6	0.015981	0.059405	0.992282	1042	4
ACADS	6	0.015981	0.059406	0.992282	1043	2
TMEM174	4	0.015999	0.052038	0.992282	1044	4
DACT1	6	0.016034	0.059589	0.992282	1045	4
FRK	4	0.016049	0.052198	0.992282	1046	4
PRKX	5	0.016054	0.053921	0.992282	1047	2
PPP2R3C	6	0.016069	0.059703	0.992282	1048	5
STAM2	4	0.016073	0.052262	0.992282	1049	2
MDK	6	0.016091	0.059763	0.992282	1050	2
ZNF165	6	0.016121	0.059867	0.992282	1051	5
PGBD2	6	0.016143	0.059943	0.992282	1052	4
MRPL40	5	0.016146	0.054174	0.992282	1053	4
HIST3H3	6	0.016171	0.060035	0.992282	1054	4
TFAP2A	5	0.016232	0.054424	0.992282	1055	4
PCYT1A	5	0.016238	0.054444	0.992282	1056	1
C16orf62	6	0.016257	0.060295	0.992282	1057	4
ALG14	4	0.016259	0.052805	0.992282	1058	1
CMTM4	6	0.01626	0.0603	0.992282	1059	4
ERCC5	5	0.016282	0.054562	0.992282	1060	4
TAS2R14	6	0.016292	0.06041	0.992282	1061	5
TAF6	6	0.016313	0.060468	0.992282	1062	5
COLGALT1	5	0.01633	0.054688	0.992282	1063	3
WDR92	6	0.016331	0.060532	0.992282	1064	5
PLK4	6	0.016365	0.060641	0.992282	1065	5
CALHM2	3	0.016376	0.042717	0.992282	1066	1
MYF6	5	0.016376	0.054817	0.992282	1067	1
PPP2R1B	6	0.016394	0.060743	0.992282	1068	4
CT47A9	4	0.016406	0.053242	0.992282	1069	2
APPL1	6	0.016422	0.060844	0.992282	1070	4
FAM185A	6	0.016445	0.060919	0.992282	1071	5
TIMM21	6	0.016462	0.060974	0.992282	1072	3
RAB9A	6	0.016477	0.061025	0.992282	1073	3
MAGEH1	6	0.016508	0.061136	0.992282	1074	5
PFKM	5	0.016531	0.05526	0.992282	1075	4
C10orf128	5	0.016548	0.055313	0.992282	1076	3
CLCF1	5	0.01656	0.055347	0.992282	1077	2
DEPDC5	6	0.016588	0.061376	0.992282	1078	3
MRPL14	5	0.016591	0.055431	0.992282	1079	4
LILRB1	6	0.016621	0.061482	0.992282	1080	3
ADK	6	0.016633	0.061526	0.992282	1081	5
MCCC2	6	0.016643	0.06156	0.992282	1082	3
FAM227A	6	0.016643	0.061561	0.992282	1083	3
TTC39B	6	0.016667	0.061632	0.992282	1084	3
MAPK7	6	0.016677	0.061671	0.992282	1085	2
KLF12	6	0.016714	0.061786	0.992282	1086	5
S100A13	4	0.016743	0.054237	0.992282	1087	3
CNR1	6	0.016747	0.061902	0.992282	1088	3
FETUB	6	0.016753	0.061918	0.992282	1089	2
MRPS5	6	0.01676	0.061936	0.992282	1090	5
RABAC1	6	0.016763	0.061951	0.992282	1091	4
CDKN2D	4	0.016766	0.054306	0.992282	1092	4
OR2T6	6	0.016775	0.061989	0.992282	1093	2
TSSK3	6	0.016857	0.06225	0.992282	1094	5
KRT25	6	0.016864	0.062265	0.992282	1095	1
SPAG6	6	0.016877	0.062312	0.992282	1096	4
NUPR1L	5	0.016882	0.056236	0.992282	1097	1
COQ7	6	0.016908	0.062407	0.992282	1098	3
HES1	6	0.016919	0.062443	0.992282	1099	2
MVB12B	5	0.016928	0.056369	0.992282	1100	3
CYP2C19	2	0.016939	0.031479	0.992282	1101	1
FAM98B	6	0.016974	0.062624	0.992282	1102	3
SCARF1	6	0.017002	0.06273	0.992282	1103	5
ALDH6A1	6	0.017021	0.062791	0.992282	1104	3
CSNK2A1	6	0.017031	0.062827	0.992282	1105	3
SLC44A1	5	0.017049	0.056702	0.992282	1106	3
ARHGEF26	6	0.017052	0.06289	0.992282	1107	2
FAM220A	6	0.017055	0.062902	0.992282	1108	4
ARID1A	6	0.017069	0.062953	0.992282	1109	4
IFT43	6	0.017084	0.063003	0.992282	1110	3
NSDHL	6	0.017094	0.063029	0.992282	1111	5
ZFP91	6	0.017106	0.063066	0.992282	1112	4
TMEM47	6	0.017134	0.063165	0.992282	1113	5
TBC1D5	6	0.01714	0.063184	0.992282	1114	2
OGN	6	0.017154	0.063238	0.992282	1115	4
ABCG8	6	0.01716	0.063249	0.992282	1116	4
RPL29	6	0.017163	0.063254	0.992282	1117	5
KLK11	5	0.01717	0.057031	0.992282	1118	4
NGFR	6	0.017185	0.063316	0.992282	1119	5
CFHR5	6	0.017211	0.063393	0.992282	1120	3
LINS	6	0.017222	0.06343	0.992282	1121	4
SEMA3G	6	0.017289	0.06363	0.992282	1122	3
SRSF1	5	0.017296	0.057369	0.992282	1123	1
GYLTL1B	6	0.017305	0.063686	0.992282	1124	1
PCDHB11	6	0.017305	0.063686	0.992282	1125	5
RPS27A	6	0.017308	0.063699	0.992282	1126	4
FBXO17	5	0.01731	0.05741	0.992282	1127	3
NOSIP	6	0.017312	0.063713	0.992282	1128	4
LURAP1	6	0.017318	0.06373	0.992282	1129	4
C11orf85	6	0.017327	0.063764	0.992282	1130	3
ATG2B	6	0.01736	0.063867	0.992282	1131	4
HSD3B2	6	0.017388	0.063957	0.992282	1132	2
GADD45A	6	0.017388	0.063957	0.992282	1133	3
NR1H2	6	0.017401	0.063995	0.992282	1134	5
FOXA2	6	0.017426	0.064075	0.992282	1135	3
ST3GAL1	5	0.017434	0.05776	0.992282	1136	1
KLF13	6	0.017445	0.064144	0.992282	1137	4
HP1BP3	6	0.017456	0.064181	0.992282	1138	4
PCM1	6	0.01747	0.064233	0.992282	1139	4
C9orf139	5	0.017477	0.057888	0.992282	1140	4
ARG1	6	0.017512	0.064376	0.992282	1141	4
FAM221B	6	0.017573	0.064567	0.992282	1142	3
ALOX12B	6	0.017581	0.064601	0.992282	1143	4
BDKRB2	6	0.017636	0.064786	0.992282	1144	1
C16orf46	5	0.017649	0.058351	0.992282	1145	3
C18orf8	6	0.017674	0.064906	0.992282	1146	5
ZNF536	6	0.017752	0.065146	0.992282	1147	2
PSMC2	6	0.017758	0.065162	0.992282	1148	4
SPRR2G	6	0.017759	0.065164	0.992282	1149	5
GINM1	6	0.017774	0.065219	0.992282	1150	2
CENPC	3	0.017791	0.04624	0.992282	1151	3
TAS2R30	6	0.017792	0.065282	0.992282	1152	4
HHATL	6	0.017843	0.065453	0.992282	1153	5
DNMT3B	6	0.017856	0.065494	0.992282	1154	2
IL21R	6	0.01787	0.065537	0.992282	1155	2
TCEAL2	6	0.017879	0.06557	0.992282	1156	4
PTPN21	6	0.017901	0.065632	0.992282	1157	3
HERC5	6	0.01792	0.065699	0.992282	1158	4
FAHD2B	6	0.017932	0.065734	0.992282	1159	3
TMIGD1	6	0.017981	0.065899	0.992282	1160	5
LIN9	5	0.017993	0.059311	0.992282	1161	3
METTL2B	6	0.018022	0.066014	0.992282	1162	2
CASP9	6	0.018077	0.066196	0.992282	1163	3
FAM47E-STBD1	6	0.018101	0.066281	0.992282	1164	5
SPATA9	6	0.018103	0.066287	0.992282	1165	3
BAI1	6	0.018116	0.066327	0.992282	1166	4
IDH2	6	0.018132	0.066381	0.992282	1167	2
BAK1	6	0.018143	0.066416	0.992282	1168	3
ATOH7	6	0.018165	0.066488	0.992282	1169	3
ZZZ3	6	0.018175	0.066521	0.992282	1170	4
SNRNP200	6	0.018187	0.066559	0.992282	1171	3
CCDC147	6	0.018232	0.066697	0.992282	1172	4
KPNB1	6	0.018242	0.066735	0.992282	1173	2
CACHD1	6	0.018271	0.066827	0.992282	1174	3
HSF1	6	0.018275	0.066834	0.992282	1175	5
LMAN2L	6	0.018276	0.066839	0.992282	1176	4
STT3B	6	0.018297	0.066909	0.992282	1177	2
GNAO1	6	0.018318	0.066984	0.992282	1178	4
HPS6	5	0.018331	0.060211	0.992282	1179	3
CLEC18C	6	0.018346	0.067073	0.992282	1180	4
HMGXB4	6	0.018363	0.067127	0.992282	1181	4
MYBPHL	6	0.018383	0.067179	0.992282	1182	4
ULK4	6	0.018408	0.067254	0.992282	1183	2
LRRIQ3	6	0.018421	0.067298	0.992282	1184	2
LEPR	6	0.018423	0.067306	0.992282	1185	4
TMEM38A	5	0.018426	0.060463	0.992282	1186	3
DCAF11	6	0.018463	0.067444	0.992282	1187	3
TSPAN13	6	0.018465	0.067453	0.992282	1188	2
CASQ1	6	0.01849	0.067536	0.992282	1189	4
SNIP1	6	0.018518	0.067622	0.992282	1190	1
CCDC80	6	0.018529	0.067655	0.992282	1191	5
UBE2Z	5	0.018531	0.060761	0.992282	1192	4
BOLL	6	0.018573	0.067796	0.992282	1193	3
POLR2I	6	0.018589	0.067844	0.992282	1194	4
KRTAP7-1	6	0.018601	0.067883	0.992282	1195	4
SPATA6	5	0.018629	0.061045	0.992282	1196	2
USP17L2	6	0.018661	0.068074	0.992282	1197	3
C7orf26	6	0.018683	0.068134	0.992282	1198	2
MR1	6	0.018738	0.068309	0.992282	1199	3
RBMS1	6	0.018778	0.06844	0.992282	1200	4
CCRL2	6	0.018793	0.068493	0.992282	1201	2
LILRA2	6	0.018894	0.068813	0.992282	1202	4
IGLL5	6	0.018902	0.06884	0.992282	1203	5
ZNF878	6	0.018903	0.068843	0.992282	1204	4
IL6R	6	0.018958	0.069025	0.992282	1205	2
TMEM176B	4	0.018983	0.060179	0.992282	1206	2
TRAP1	6	0.019012	0.069197	0.992282	1207	5
MEIS1	6	0.019013	0.069201	0.992282	1208	1
APOC1	6	0.019014	0.069201	0.992282	1209	4
GPR182	6	0.019027	0.069252	0.992282	1210	3
WHSC1L1	6	0.019052	0.069331	0.992282	1211	4
FAM86B1	4	0.01906	0.060358	0.992282	1212	3
SLC6A13	6	0.019068	0.069385	0.992282	1213	3
AQP11	6	0.019069	0.069387	0.992282	1214	1
TMEM182	6	0.019073	0.069405	0.992282	1215	5
SLC48A1	6	0.019082	0.069436	0.992282	1216	3
BIVM	3	0.019113	0.049431	0.992282	1217	2
TNFSF13	6	0.019124	0.069566	0.992282	1218	1
ERBB2IP	6	0.019157	0.069663	0.992282	1219	3
AOAH	6	0.019158	0.069664	0.992282	1220	5
TEAD3	6	0.019172	0.069715	0.992282	1221	3
BOLA3	6	0.019178	0.06973	0.992282	1222	4
SIX1	6	0.019179	0.069734	0.992282	1223	3
PNMAL2	5	0.019267	0.062758	0.992282	1224	2
XKR3	6	0.019277	0.070064	0.992282	1225	5
FAM189B	6	0.019283	0.070081	0.992282	1226	3
FAM213A	6	0.019289	0.070099	0.992282	1227	3
OLFML1	6	0.019303	0.070146	0.992282	1228	3
SETD2	5	0.019306	0.062867	0.992282	1229	3
SRI	5	0.019336	0.062949	0.992282	1230	3
MYL9	6	0.019399	0.07044	0.992282	1231	3
PIK3R5	5	0.01941	0.063135	0.992282	1232	3
CETN2	6	0.019411	0.070485	0.992282	1233	5
HIST1H2BA	6	0.019462	0.070649	0.992282	1234	3
SUPT20HL2	6	0.019468	0.070669	0.992282	1235	4
ARHGAP12	6	0.019509	0.070798	0.992282	1236	3
ADH6	6	0.019516	0.070817	0.992282	1237	3
HTRA2	6	0.019567	0.070982	0.992282	1238	4
TIMMDC1	6	0.019584	0.071031	0.992282	1239	5
RBM48	6	0.019606	0.0711	0.992282	1240	5
ITGAV	6	0.019643	0.071223	0.992282	1241	4
TBX6	6	0.019659	0.071275	0.992282	1242	4
TMEM145	6	0.019677	0.071331	0.992282	1243	4
ETV5	6	0.019716	0.071468	0.992282	1244	4
TC2N	6	0.019722	0.071484	0.992282	1245	3
SMPD1	6	0.019729	0.071505	0.992282	1246	2
TSSC1	5	0.019731	0.063991	0.992282	1247	4
TOMM40L	5	0.019766	0.06409	0.992282	1248	4
ZNF227	6	0.019808	0.071754	0.992282	1249	5
CLDN7	6	0.019833	0.071841	0.992282	1250	5
ZNF287	6	0.019834	0.071845	0.992282	1251	4
CFB	6	0.019876	0.071967	0.992282	1252	4
RAB34	6	0.019894	0.072021	0.992282	1253	1
PTGR1	5	0.01992	0.064503	0.992282	1254	3
SLAIN2	6	0.01996	0.07225	0.992282	1255	4
RAX2	5	0.019969	0.064628	0.992282	1256	4
BSN	6	0.019978	0.072301	0.992282	1257	4
ZNF410	6	0.019979	0.072307	0.992282	1258	4
LGALS9	4	0.019999	0.062373	0.992282	1259	3
TRA2A	6	0.020004	0.0724	0.992282	1260	2
THOC1	5	0.020011	0.064746	0.992282	1261	3
ZNF41	6	0.020031	0.072491	0.992282	1262	4
KRTAP15-1	6	0.020038	0.072514	0.992282	1263	3
PPP1R18	6	0.020051	0.072555	0.992282	1264	5
RGS13	6	0.020059	0.07258	0.992282	1265	3
MT1M	6	0.020088	0.072675	0.992282	1266	5
KDM5A	6	0.020098	0.072698	0.992282	1267	2
EIF5A	6	0.020114	0.072742	0.992282	1268	3
FIS1	6	0.02015	0.072851	0.992282	1269	4
PUS10	6	0.020157	0.07287	0.992282	1270	5
NPPB	6	0.020169	0.072914	0.992282	1271	3
SLC6A8	5	0.02017	0.065163	0.992282	1272	3
HIST2H2AB	6	0.020181	0.072946	0.992282	1273	3
CEP120	6	0.020207	0.073027	0.992282	1274	5
AVL9	6	0.02021	0.073032	0.992282	1275	4
ZNF778	5	0.020235	0.06533	0.992282	1276	2
MMP3	6	0.020237	0.073102	0.992282	1277	4
SHCBP1	6	0.020255	0.07316	0.992282	1278	3
ACHE	6	0.020283	0.073248	0.992282	1279	3
CLDN15	6	0.020315	0.073358	0.992282	1280	4
HIST2H2AA4	6	0.02032	0.073372	0.992282	1281	4
GLRB	5	0.020328	0.065582	0.992282	1282	3
EDN3	6	0.020334	0.073434	0.992282	1283	2
CD226	5	0.020344	0.065628	0.992282	1284	4
APEX1	6	0.020347	0.073473	0.992282	1285	4
ANKRD42	6	0.020376	0.073558	0.992282	1286	2
SMC2	6	0.020389	0.073609	0.992282	1287	3
SHISA5	5	0.020404	0.065794	0.992282	1288	4
HDGF	6	0.020427	0.073728	0.992282	1289	3
SLC1A7	6	0.020444	0.073784	0.992282	1290	2
CD6	6	0.020478	0.073895	0.992282	1291	3
LSP1	4	0.02052	0.063463	0.992282	1292	3
PDE4C	6	0.020537	0.074071	0.992282	1293	3
CCDC157	6	0.020577	0.0742	0.992282	1294	4
KLF11	6	0.02058	0.074206	0.992282	1295	4
C6orf222	5	0.020603	0.066318	0.992282	1296	4
SIM2	6	0.020609	0.074299	0.992282	1297	3
TAF2	6	0.020673	0.074498	0.992282	1298	2
MCAT	5	0.020674	0.066513	0.992282	1299	4
BAI2	6	0.020685	0.074534	0.992282	1300	5
COG7	6	0.020701	0.074582	0.992282	1301	4
LNX1	6	0.020709	0.074612	0.992282	1302	4
CHST4	5	0.020711	0.066608	0.992282	1303	3
ANGPTL4	6	0.020766	0.074773	0.992282	1304	4
GAD2	5	0.020923	0.06717	0.992282	1305	4
OR13C9	6	0.02093	0.0753	0.992282	1306	4
ZKSCAN8	6	0.020939	0.075329	0.992282	1307	2
TACSTD2	6	0.020992	0.075492	0.992282	1308	3
ARFGEF1	6	0.021049	0.07568	0.992282	1309	2
DENR	5	0.021057	0.067535	0.992282	1310	4
FAM47A	6	0.021065	0.075719	0.992282	1311	3
COPS7B	6	0.021084	0.075784	0.992282	1312	3
MTMR14	5	0.021113	0.067701	0.992282	1313	4
CHERP	6	0.02113	0.075934	0.992282	1314	4
ZNF526	6	0.021143	0.075976	0.992282	1315	5
C17orf51	5	0.02116	0.067847	0.992282	1316	3
MMGT1	6	0.021181	0.076079	0.992282	1317	4
ARMC2	6	0.021204	0.076154	0.992282	1318	4
COX14	6	0.021214	0.076181	0.992282	1319	2
CDNF	6	0.021215	0.076184	0.992282	1320	4
SPRYD3	6	0.021217	0.076187	0.992282	1321	5
MAP3K5	6	0.021269	0.076347	0.992282	1322	3
BOLA2B	6	0.021324	0.07653	0.992282	1323	2
ERH	6	0.02135	0.076612	0.992282	1324	3
TTC17	6	0.021354	0.076625	0.992282	1325	3
FAM26D	6	0.021379	0.076693	0.992282	1326	3
FUT7	6	0.021413	0.076811	0.992282	1327	3
BANK1	5	0.021488	0.068706	0.992282	1328	4
SLC25A47	6	0.021513	0.077138	0.992282	1329	3
SEC31B	6	0.021523	0.077165	0.992282	1330	4
USP22	6	0.021537	0.077207	0.992282	1331	3
PARVB	6	0.021544	0.077224	0.992282	1332	1
BAGE3	2	0.021559	0.039824	0.992282	1333	2
SPTLC3	6	0.02157	0.077302	0.992282	1334	5
SUMO1	6	0.021587	0.077359	0.992282	1335	4
DHX9	6	0.021596	0.077394	0.992282	1336	3
NBR1	6	0.021599	0.077408	0.992282	1337	1
BBS10	6	0.021615	0.077464	0.992282	1338	5
YBX2	6	0.021625	0.077502	0.992282	1339	2
PRODH	6	0.021662	0.077622	0.992282	1340	4
APMAP	6	0.021668	0.077643	0.992282	1341	4
MTPAP	6	0.021709	0.077766	0.992282	1342	3
KIRREL	6	0.021764	0.077926	0.992282	1343	2
DDX39B	6	0.021768	0.077943	0.992282	1344	3
CAPRIN2	6	0.021791	0.078017	0.992282	1345	4
TBX18	6	0.021819	0.078102	0.992282	1346	3
SPPL3	6	0.021874	0.078266	0.992282	1347	4
RNF185	6	0.021882	0.078298	0.992282	1348	3
UFL1	6	0.021929	0.078442	0.992282	1349	4
PPP1R13B	6	0.021983	0.078633	0.992282	1350	2
G6PC3	6	0.021996	0.078664	0.992282	1351	3
DHX34	6	0.022001	0.078682	0.992282	1352	5
NACC2	6	0.022006	0.078701	0.992282	1353	5
AEBP1	6	0.022041	0.078811	0.992282	1354	5
NID2	5	0.022069	0.070288	0.992282	1355	3
ATM	6	0.022093	0.078971	0.992282	1356	4
ACOT12	6	0.022101	0.079007	0.992282	1357	5
TMEM191B	6	0.022113	0.079048	0.992282	1358	5
LCN8	5	0.022118	0.070402	0.992282	1359	3
FEM1A	6	0.022123	0.079076	0.992282	1360	5
GAGE10	5	0.022132	0.070433	0.992282	1361	4
P2RY11	6	0.022148	0.079157	0.992282	1362	1
UTP3	6	0.022161	0.079196	0.992282	1363	5
ABCC4	6	0.022201	0.079312	0.992282	1364	5
GOLT1B	6	0.022203	0.07932	0.992282	1365	4
SLC25A21	6	0.022208	0.079333	0.992282	1366	4
TYSND1	6	0.022209	0.079338	0.992282	1367	3
CNTNAP5	6	0.022225	0.079384	0.992282	1368	5
EIF4EBP2	6	0.022238	0.07943	0.992282	1369	4
WDR78	6	0.022249	0.079462	0.992282	1370	5
TEPP	6	0.022252	0.07947	0.992282	1371	4
KIFC3	6	0.022255	0.079482	0.992282	1372	3
NKIRAS2	6	0.022258	0.079492	0.992282	1373	2
ZCCHC11	6	0.022258	0.079492	0.992282	1374	5
FAM96B	5	0.022271	0.070795	0.992282	1375	3
PCDHA5	2	0.022286	0.041189	0.992282	1376	1
SDS	6	0.022286	0.079575	0.992282	1377	4
RPL36	6	0.022295	0.079595	0.992282	1378	4
KRT18	5	0.022321	0.070931	0.992282	1379	4
GSTM5	6	0.022335	0.079724	0.992282	1380	4
GRIN2C	6	0.022368	0.079827	0.992282	1381	4
AVPI1	5	0.022372	0.071059	0.992282	1382	4
PEX10	5	0.022381	0.071076	0.992282	1383	4
CDC5L	6	0.022387	0.079882	0.992282	1384	5
DIO2	5	0.022393	0.071108	0.992282	1385	3
VTCN1	6	0.022422	0.079989	0.992282	1386	4
HLA-DPB1	6	0.022423	0.079993	0.992282	1387	1
DSG1	6	0.022442	0.080054	0.992282	1388	5
CD36	6	0.02246	0.080112	0.992282	1389	2
AATF	6	0.022474	0.080154	0.992282	1390	5
FSTL5	6	0.022491	0.080209	0.992282	1391	5
PSMG1	6	0.022499	0.08024	0.992282	1392	4
NAA25	5	0.022504	0.071411	0.992282	1393	3
DUOX2	6	0.022516	0.080287	0.992282	1394	5
GPR179	6	0.022539	0.080367	0.992282	1395	5
SLC5A6	6	0.022588	0.080517	0.992282	1396	3
OR52I2	6	0.022597	0.080547	0.992282	1397	4
ABHD12B	6	0.022605	0.080572	0.992282	1398	5
PPFIA1	5	0.022619	0.07171	0.992282	1399	2
GK2	6	0.022771	0.08111	0.992282	1400	3
C16orf54	6	0.022772	0.081113	0.992282	1401	5
GFM1	6	0.022778	0.081129	0.992282	1402	5
SH3GL3	6	0.022796	0.081175	0.992282	1403	5
IFNA21	6	0.022807	0.081204	0.992282	1404	2
CXCL3	6	0.022878	0.081438	0.992282	1405	4
MAGEE1	6	0.022895	0.081488	0.992282	1406	4
ITGBL1	6	0.022961	0.081699	0.992282	1407	5
FCHSD2	6	0.022972	0.081736	0.992282	1408	2
FAM180A	6	0.022975	0.081743	0.992282	1409	5
CISD3	5	0.022985	0.072708	0.992282	1410	2
TCF7L1	5	0.022998	0.072741	0.992282	1411	4
CHI3L1	6	0.023002	0.081828	0.992282	1412	3
ARMC3	6	0.023005	0.081841	0.992282	1413	3
UNC45B	6	0.023035	0.08193	0.992282	1414	3
NPY1R	5	0.023036	0.072862	0.992282	1415	3
SRSF2	6	0.023077	0.082061	0.992282	1416	5
ZAR1	6	0.023082	0.082076	0.992282	1417	1
C9orf163	6	0.023097	0.082121	0.992282	1418	5
RRH	5	0.023123	0.073077	0.992282	1419	2
KLC2	6	0.023126	0.082227	0.992282	1420	4
CT45A6	6	0.023136	0.082264	0.992282	1421	4
LTN1	6	0.023191	0.082435	0.992282	1422	3
AJUBA	6	0.023213	0.082506	0.992282	1423	4
TMEM230	6	0.023213	0.082506	0.992282	1424	4
TGM6	5	0.023214	0.073298	0.992282	1425	2
SERPINB2	6	0.023248	0.08262	0.992282	1426	5
GSTCD	6	0.023259	0.082649	0.992282	1427	4
DEFB116	6	0.023261	0.082654	0.992282	1428	3
FOXE1	6	0.023301	0.082775	0.992282	1429	3
CEACAM3	6	0.023338	0.082897	0.992282	1430	4
VPS29	6	0.02335	0.082944	0.992282	1431	5
PIK3CG	6	0.023388	0.083072	0.992282	1432	3
CD24	5	0.023389	0.073761	0.992282	1433	3
TCERG1	6	0.023391	0.083078	0.992282	1434	4
TEP1	6	0.023408	0.08313	0.992282	1435	2
GALNT6	6	0.023411	0.083142	0.992282	1436	4
KLF2	6	0.023418	0.083162	0.992282	1437	3
AGFG2	6	0.023457	0.083272	0.992282	1438	3
IMPDH1	6	0.023466	0.083301	0.992282	1439	4
ZFP3	6	0.023467	0.083307	0.992282	1440	2
MTG2	6	0.02349	0.083373	0.992282	1441	3
RFTN2	6	0.023552	0.083557	0.992282	1442	5
NUP93	6	0.023601	0.083712	0.992282	1443	3
ZNF470	6	0.023613	0.083751	0.992282	1444	4
VWA3B	5	0.023685	0.074525	0.992282	1445	4
MUC2	6	0.023685	0.083969	0.992282	1446	2
BAIAP2L2	6	0.023691	0.083995	0.992282	1447	4
DCUN1D3	6	0.023692	0.083997	0.992282	1448	5
CSRNP3	4	0.023738	0.070122	0.992282	1449	2
RBM33	6	0.023772	0.084228	0.992282	1450	5
MAGED2	6	0.023822	0.08439	0.992282	1451	3
CYP4X1	6	0.023858	0.084503	0.992282	1452	4
MAP2K7	6	0.023862	0.084514	0.992282	1453	5
WBP2	6	0.023888	0.084592	0.992282	1454	5
OR5M8	6	0.023889	0.084594	0.992282	1455	3
NCKIPSD	6	0.023905	0.084648	0.992282	1456	3
PLSCR5	6	0.023928	0.084717	0.992282	1457	4
BMP15	6	0.023959	0.084834	0.992282	1458	3
ARMS2	6	0.023984	0.084917	0.992282	1459	5
SNTB2	5	0.023988	0.075297	0.992282	1460	4
LBR	6	0.024014	0.085015	0.992282	1461	1
G6PD	6	0.024023	0.085041	0.992282	1462	2
STK39	6	0.024027	0.08505	0.992282	1463	4
SNTA1	6	0.024043	0.085107	0.992282	1464	3
WFDC2	6	0.024069	0.085184	0.992282	1465	4
CRISP1	5	0.02408	0.075544	0.992282	1466	3
RNF187	6	0.024082	0.085216	0.992282	1467	3
ZNF646	5	0.024083	0.07555	0.992282	1468	1
PNKP	5	0.024103	0.075606	0.992282	1469	4
CC2D1A	6	0.024124	0.085346	0.992282	1470	2
KPNA4	5	0.024129	0.075661	0.992282	1471	2
C9orf96	6	0.024135	0.085391	0.992282	1472	4
CD302	5	0.024178	0.075803	0.992282	1473	4
LSR	6	0.024179	0.085527	0.992282	1474	2
TINAG	6	0.024216	0.085633	0.992282	1475	3
UBQLN3	6	0.024234	0.08569	0.992282	1476	3
OR2T10	6	0.024262	0.085767	0.992282	1477	2
IKBKAP	5	0.024346	0.076246	0.992282	1478	4
NIPAL1	6	0.024354	0.086061	0.992282	1479	5
THPO	6	0.024361	0.086085	0.992282	1480	5
GABPA	6	0.024398	0.086195	0.992282	1481	4
MITD1	6	0.024453	0.08638	0.992282	1482	3
NTN5	6	0.024463	0.086413	0.992282	1483	4
RCC2	4	0.024487	0.07163	0.992282	1484	2
LEP	5	0.024562	0.076814	0.992282	1485	4
NLRC3	6	0.024567	0.086735	0.992282	1486	3
ZNF721	6	0.024581	0.086779	0.992282	1487	4
SUMF1	5	0.024584	0.076871	0.992282	1488	2
ORM2	6	0.024617	0.08689	0.992282	1489	2
EPPIN-WFDC6	5	0.024626	0.076978	0.992282	1490	2
PPARGC1A	6	0.024652	0.086995	0.992282	1491	3
GC	6	0.024663	0.087028	0.992282	1492	4
RASSF7	6	0.024694	0.087143	0.992282	1493	5
KRTAP9-1	6	0.024695	0.087147	0.992282	1494	3
SPRED3	6	0.024701	0.087166	0.992282	1495	4
DHX37	6	0.024713	0.0872	0.992282	1496	5
TCHH	6	0.024727	0.087245	0.992282	1497	3
OR11A1	4	0.024743	0.072148	0.992282	1498	1
FZD4	6	0.02475	0.087306	0.992282	1499	4
ZCCHC7	5	0.024769	0.077336	0.992282	1500	2
PANK1	6	0.024782	0.087402	0.992282	1501	4
ATP2B2	5	0.024815	0.077459	0.992282	1502	2
SYCE1L	6	0.024836	0.087551	0.992282	1503	3
LDLRAD2	6	0.024891	0.087722	0.992282	1504	4
MEX3D	5	0.024975	0.077869	0.992282	1505	4
HMGCL	6	0.02499	0.087987	0.992282	1506	4
DUSP18	6	0.025001	0.088016	0.992282	1507	4
ATP1A4	6	0.025018	0.088076	0.992282	1508	4
PRSS12	6	0.025022	0.088086	0.992282	1509	4
NUDT13	6	0.025047	0.088164	0.992282	1510	5
SLC43A3	6	0.025056	0.08819	0.992282	1511	2
TUBB2B	6	0.025073	0.088238	0.992282	1512	5
HES4	6	0.02511	0.088344	0.992282	1513	3
MAGT1	6	0.025132	0.088421	0.992282	1514	5
TRIM39	2	0.025143	0.046263	0.992282	1515	1
MPP7	6	0.025155	0.088492	0.992282	1516	5
PAN3	6	0.025155	0.088492	0.992282	1517	5
KIR2DL3	6	0.025165	0.088524	0.992282	1518	3
PAF1	6	0.025195	0.088612	0.992282	1519	5
OCM2	5	0.025207	0.078469	0.992282	1520	4
ZNF764	5	0.025215	0.07849	0.992282	1521	4
MS4A1	6	0.02522	0.088688	0.992282	1522	3
NUDT11	6	0.025232	0.088723	0.992282	1523	4
TCEB3C	3	0.025259	0.064299	0.992282	1524	2
BTF3	6	0.02526	0.088803	0.992282	1525	4
PRPF3	6	0.025267	0.088824	0.992282	1526	2
ARFIP2	6	0.025275	0.088851	0.992282	1527	3
ZNF793	6	0.025316	0.088991	0.992282	1528	5
C1orf131	6	0.02533	0.089035	0.992282	1529	4
OBP2B	6	0.025354	0.089098	0.992282	1530	5
CWF19L2	5	0.025363	0.078888	0.992282	1531	4
SERPINE3	6	0.025375	0.089162	0.992282	1532	2
FAM229B	6	0.025384	0.089195	0.992282	1533	3
ZNF485	6	0.025439	0.089365	0.992282	1534	1
PPCS	6	0.025441	0.089371	0.992282	1535	4
NPIPA3	3	0.025444	0.064737	0.992282	1536	3
DSC2	6	0.025447	0.089389	0.992282	1537	4
RPS23	6	0.025456	0.089421	0.992282	1538	2
OR7C2	6	0.02551	0.089572	0.992282	1539	3
TMEM95	6	0.025528	0.089624	0.992282	1540	4
RASSF3	6	0.025532	0.089637	0.992282	1541	3
LRIG2	6	0.025543	0.089679	0.992282	1542	3
KRT34	6	0.025574	0.08977	0.992282	1543	2
GNRH2	6	0.025576	0.089775	0.992282	1544	3
ZNF682	6	0.025576	0.089775	0.992282	1545	2
NAGA	6	0.025591	0.089816	0.992282	1546	5
ELSPBP1	6	0.025601	0.08985	0.992282	1547	5
COX8A	6	0.025641	0.089987	0.992282	1548	3
GSAP	2	0.025658	0.047192	0.992282	1549	1
FADS3	6	0.025679	0.090119	0.992282	1550	3
PILRA	6	0.025682	0.09013	0.992282	1551	4
C6orf203	6	0.025709	0.090206	0.992282	1552	3
THRAP3	5	0.025721	0.079874	0.992282	1553	4
VWA1	6	0.025729	0.090263	0.992282	1554	5
SLC8A1	6	0.025733	0.090278	0.992282	1555	5
RAB19	6	0.025768	0.09038	0.992282	1556	2
THAP10	5	0.025774	0.079992	0.992282	1557	1
MKNK1	6	0.025798	0.090471	0.992282	1558	5
TDG	5	0.025826	0.080109	0.992282	1559	3
AP3B1	6	0.025846	0.090612	0.992282	1560	2
INTS8	6	0.025856	0.090636	0.992282	1561	2
IL3	6	0.025861	0.090652	0.992282	1562	3
FOXO3	6	0.025877	0.090701	0.992282	1563	2
GPHA2	6	0.025899	0.090771	0.992282	1564	5
TMEM245	5	0.025903	0.080302	0.992282	1565	4
DNAJA2	6	0.025913	0.090817	0.992282	1566	4
MRPS16	6	0.025928	0.09087	0.992282	1567	2
PLXNA2	6	0.025932	0.090885	0.992282	1568	2
RGS18	6	0.025951	0.090933	0.992282	1569	4
C14orf159	5	0.025953	0.080434	0.992282	1570	2
DUSP3	5	0.025962	0.08046	0.992282	1571	3
VAV3	6	0.025984	0.091023	0.992282	1572	3
TXNRD2	6	0.025987	0.091028	0.992282	1573	2
MDFIC	5	0.025996	0.080552	0.992282	1574	3
MYOZ3	6	0.026001	0.091072	0.992282	1575	2
MANF	5	0.026014	0.080604	0.992282	1576	3
CD40LG	6	0.026024	0.091144	0.992282	1577	4
FAM13A	6	0.026072	0.09129	0.992282	1578	4
CCDC94	5	0.026094	0.080807	0.992282	1579	1
NME4	6	0.026096	0.091375	0.992282	1580	1
WIPI1	6	0.026116	0.091436	0.992282	1581	4
ANKRD20A4	6	0.026125	0.091468	0.992282	1582	2
SAA4	6	0.02614	0.091513	0.992282	1583	2
KLHL18	6	0.02614	0.091513	0.992282	1584	2
CCDC84	6	0.026151	0.091556	0.992282	1585	3
ISL1	6	0.026173	0.091621	0.992282	1586	5
SYCP3	6	0.026189	0.091672	0.992282	1587	5
MEDAG	6	0.026209	0.091731	0.992282	1588	5
SAMM50	6	0.026209	0.091733	0.992282	1589	3
ADAMTS8	6	0.026228	0.091792	0.992282	1590	4
NMI	6	0.026254	0.09187	0.992282	1591	4
CTSC	6	0.026315	0.092056	0.992282	1592	4
ITGA3	5	0.026341	0.08148	0.992282	1593	3
ABHD17C	6	0.02637	0.092222	0.992282	1594	4
SPATC1L	6	0.026377	0.092251	0.992282	1595	4
KIF4A	5	0.026413	0.081677	0.992282	1596	3
SLC35A5	6	0.026425	0.0924	0.992282	1597	3
SLX1B	6	0.02643	0.09241	0.992282	1598	3
ABCC3	6	0.026444	0.092446	0.992282	1599	3
CEBPE	6	0.026461	0.092505	0.992282	1600	3
PTGDS	6	0.026479	0.092563	0.992282	1601	3
EPN2	5	0.026481	0.081857	0.992282	1602	4
PNPT1	5	0.026483	0.081862	0.992282	1603	3
AUP1	6	0.026484	0.092582	0.992282	1604	4
AES	6	0.026534	0.092744	0.992282	1605	3
PSMA4	6	0.026558	0.092819	0.992282	1606	3
XRCC4	6	0.026582	0.092888	0.992282	1607	5
CATSPERB	6	0.026589	0.092906	0.992282	1608	4
OR10C1	6	0.026608	0.09296	0.992282	1609	4
CDC40	6	0.026608	0.092961	0.992282	1610	5
TAS2R19	6	0.026626	0.093021	0.992282	1611	4
DAD1	6	0.026643	0.093077	0.992282	1612	3
HPRT1	6	0.026646	0.093081	0.992282	1613	5
C11orf31	5	0.026646	0.082303	0.992282	1614	3
JMY	6	0.026658	0.093119	0.992282	1615	3
RUSC2	5	0.026691	0.082426	0.992282	1616	4
HPSE2	6	0.026696	0.093245	0.992282	1617	4
FARSB	6	0.026698	0.093252	0.992282	1618	3
LHFPL4	6	0.026772	0.093472	0.992282	1619	5
HOXB3	5	0.026778	0.082672	0.992282	1620	3
C17orf97	5	0.026794	0.082712	0.992282	1621	4
EPS15L1	6	0.026802	0.09356	0.992282	1622	3
ALS2CR11	6	0.026808	0.093575	0.992282	1623	4
EEF1G	6	0.026847	0.093696	0.992282	1624	3
PAK2	6	0.026862	0.093746	0.992282	1625	3
HTR3B	6	0.026892	0.093834	0.992282	1626	4
ACADM	6	0.0269	0.093857	0.992282	1627	3
RPL35A	5	0.026915	0.083037	0.992282	1628	1
GPN2	6	0.026917	0.093912	0.992282	1629	3
NBPF16	5	0.026947	0.083116	0.992282	1630	4
SERPINB5	6	0.026987	0.094118	0.992282	1631	3
ADSSL1	6	0.027026	0.094244	0.992282	1632	3
FLVCR1	6	0.027061	0.094338	0.992282	1633	5
GIPC2	6	0.027107	0.094482	0.992282	1634	5
NAGK	6	0.027136	0.09457	0.992282	1635	3
TIPARP	6	0.027142	0.094596	0.992282	1636	5
HESX1	5	0.027143	0.083647	0.992282	1637	3
ZBTB43	6	0.027178	0.0947	0.992282	1638	5
CTCF	6	0.027183	0.094722	0.992282	1639	5
C11orf74	6	0.027204	0.094787	0.992282	1640	4
GLTSCR1L	6	0.027212	0.094808	0.992282	1641	4
ANXA11	5	0.027233	0.08387	0.992282	1642	3
NUDT9	6	0.027252	0.094936	0.992282	1643	2
SHF	5	0.02728	0.083994	0.992282	1644	2
PPP2R5A	6	0.027284	0.095041	0.992282	1645	5
HMGN1	5	0.027286	0.084005	0.992282	1646	3
UBOX5	6	0.027299	0.095083	0.992282	1647	5
CNPPD1	6	0.027303	0.095094	0.992282	1648	4
VMO1	6	0.027354	0.095267	0.992282	1649	2
KCTD11	6	0.027383	0.095363	0.992282	1650	3
GALC	6	0.027409	0.095442	0.992282	1651	1
AIF1L	5	0.027417	0.084328	0.992282	1652	2
NDUFB8	6	0.027426	0.095487	0.992282	1653	4
ANKS6	5	0.027434	0.084372	0.992282	1654	3
ARMC7	5	0.027441	0.084389	0.992282	1655	3
TMEM52	6	0.027451	0.095572	0.992282	1656	3
SF3A1	5	0.027463	0.084439	0.992282	1657	2
PPP1R3E	6	0.027464	0.095601	0.992282	1658	2
FAM227B	6	0.027473	0.095632	0.992282	1659	3
DCST1	6	0.027489	0.095676	0.992282	1660	3
MUC22	6	0.02752	0.09577	0.992282	1661	5
TGIF2LY	6	0.027526	0.095791	0.992282	1662	5
ELAC1	6	0.027547	0.095854	0.992282	1663	4
FBXW7	6	0.027549	0.095861	0.992282	1664	4
C7orf43	6	0.027557	0.09588	0.992282	1665	5
PPP1R10	6	0.027573	0.095933	0.992282	1666	3
SEMG2	6	0.027628	0.0961	0.992282	1667	2
TUBA1B	6	0.027647	0.096158	0.992282	1668	4
MIER1	5	0.027652	0.084935	0.992282	1669	3
LEMD2	6	0.027663	0.096209	0.992282	1670	4
SCARB2	6	0.027677	0.096251	0.992282	1671	4
ISCU	6	0.027686	0.096288	0.992282	1672	5
CATSPERD	4	0.027687	0.078177	0.992282	1673	3
GMFG	5	0.027692	0.085035	0.992282	1674	4
RGL1	5	0.027696	0.085042	0.992282	1675	2
DEFB112	6	0.027725	0.0964	0.992282	1676	5
PC	6	0.027731	0.096419	0.992282	1677	4
ARMCX3	6	0.027737	0.096433	0.992282	1678	3
FKBPL	6	0.027748	0.096477	0.992282	1679	4
FOSL1	6	0.027755	0.0965	0.992282	1680	3
FDPS	6	0.027762	0.096524	0.992282	1681	5
ACIN1	6	0.02778	0.096583	0.992282	1682	3
CCZ1	4	0.027781	0.078384	0.992282	1683	3
ADAMTS5	5	0.027782	0.085254	0.992282	1684	4
TNFRSF1A	6	0.027798	0.096629	0.992282	1685	3
PCK1	4	0.027815	0.078461	0.992282	1686	2
CSRP2	6	0.027823	0.09671	0.992282	1687	2
C8orf82	5	0.027841	0.085416	0.992282	1688	4
ZNF48	5	0.027858	0.085447	0.992282	1689	3
DRP2	6	0.027901	0.096941	0.992282	1690	3
PFDN5	6	0.027988	0.097231	0.992282	1691	3
EMD	6	0.02801	0.097299	0.992282	1692	1
AP5Z1	6	0.028065	0.097435	0.992282	1693	2
AKAP2	6	0.028073	0.09745	0.992282	1694	4
ZNHIT3	6	0.02812	0.097555	0.992282	1695	3
PRSS54	6	0.028153	0.097635	0.992282	1696	3
SLC4A2	5	0.028177	0.086282	0.992282	1697	3
EPHA3	6	0.028185	0.097711	0.992282	1698	4
JAKMIP3	6	0.02819	0.097722	0.992282	1699	3
PKIG	5	0.02821	0.086371	0.992282	1700	3
DOCK7	6	0.028256	0.097871	0.992282	1701	3
LPAR3	6	0.02827	0.097902	0.992282	1702	3
SAMSN1	5	0.028346	0.086713	0.992282	1703	3
C1orf65	6	0.028433	0.098288	0.992282	1704	4
C7orf50	4	0.028433	0.079688	0.992282	1705	3
C21orf2	6	0.028448	0.098319	0.992282	1706	2
WDR72	5	0.028466	0.087017	0.992282	1707	2
NKX2-8	6	0.028474	0.098385	0.992282	1708	3
RALGPS1	6	0.02849	0.098419	0.992282	1709	3
PDCL3	6	0.028502	0.098449	0.992282	1710	2
GGNBP2	6	0.028557	0.098571	0.992282	1711	3
TMEM132B	6	0.028559	0.098576	0.992282	1712	3
CCT6B	6	0.028576	0.098615	0.992282	1713	4
ZNF33A	5	0.028587	0.087323	0.992282	1714	4
RPL5	5	0.028602	0.087361	0.992282	1715	2
USP34	6	0.028609	0.098704	0.992282	1716	4
FGL2	6	0.028611	0.098711	0.992282	1717	2
CHD7	6	0.028666	0.098822	0.992282	1718	1
G6PC	5	0.028676	0.087562	0.992282	1719	4
RBMY1J	6	0.02868	0.098866	0.992282	1720	3
PPARA	6	0.028721	0.098959	0.992282	1721	4
POMGNT2	6	0.028775	0.099085	0.992282	1722	3
ANKIB1	6	0.028789	0.099115	0.992282	1723	4
NDRG3	6	0.028802	0.099143	0.992282	1724	4
FAM194A	6	0.028818	0.099182	0.992282	1725	2
RSPRY1	6	0.028832	0.099214	0.992282	1726	3
PEG3	1	0.028861	0.028757	0.992282	1727	1
LATS1	5	0.028883	0.088092	0.992282	1728	3
PTN	6	0.028888	0.099339	0.992282	1729	3
SLC4A5	6	0.028905	0.099373	0.992282	1730	2
MUC20	6	0.028939	0.099453	0.992282	1731	3
TTC34	6	0.028948	0.099474	0.992282	1732	3
NKX1-2	5	0.028967	0.08832	0.992282	1733	2
COL19A1	6	0.028975	0.099537	0.992282	1734	2
TMEM179B	6	0.028995	0.099581	0.992282	1735	4
PNISR	6	0.029002	0.0996	0.992282	1736	2
MFRP	5	0.02903	0.088475	0.992282	1737	4
TOP1	6	0.029034	0.099684	0.992282	1738	4
LHX9	6	0.029048	0.099714	0.992282	1739	3
C5orf42	6	0.029056	0.099731	0.992282	1740	3
RGS2	6	0.029062	0.099743	0.992282	1741	4
ZNF367	6	0.029074	0.099768	0.992282	1742	4
AHCYL1	5	0.029075	0.088582	0.992282	1743	4
SLC35A1	6	0.029094	0.099815	0.992282	1744	4
TCEANC	6	0.029099	0.099824	0.992282	1745	2
CLPP	6	0.02911	0.099841	0.992282	1746	4
CBLN4	6	0.029115	0.099856	0.992282	1747	4
C5	6	0.029132	0.099894	0.992282	1748	3
LACE1	6	0.02914	0.099912	0.992282	1749	4
DNAH14	6	0.029141	0.099912	0.992282	1750	3
CCM2	5	0.029173	0.088828	0.992282	1751	2
HHAT	6	0.029211	0.10008	0.992282	1752	4
XAGE2	5	0.029254	0.089018	0.992282	1753	4
CLEC12A	6	0.029267	0.1002	0.992282	1754	1
FAM110D	6	0.029341	0.10037	0.992282	1755	3
LPIN3	6	0.029375	0.10046	0.992282	1756	4
RAMP1	6	0.029376	0.10046	0.992282	1757	3
C16orf92	5	0.029377	0.089323	0.992282	1758	3
C1QTNF2	6	0.029409	0.10054	0.992282	1759	4
SP7	6	0.02943	0.10059	0.992282	1760	2
OR6C2	6	0.029521	0.1008	0.992282	1761	4
ING3	6	0.02954	0.10085	0.992282	1762	4
GOLGA6L10	3	0.029552	0.074325	0.992282	1763	2
GABARAPL2	6	0.029582	0.10095	0.992282	1764	4
MRAP	5	0.029595	0.089873	0.992282	1765	3
LGALS13	5	0.029661	0.090042	0.992282	1766	3
HK1	5	0.029695	0.090125	0.992282	1767	1
OR13C3	6	0.029701	0.10121	0.992282	1768	3
OGFOD2	6	0.02972	0.10125	0.992282	1769	4
TMPRSS11E	6	0.029758	0.10134	0.992282	1770	3
TEAD1	5	0.029766	0.090306	0.992282	1771	3
RTN4R	6	0.029767	0.10136	0.992282	1772	4
FAM86C1	6	0.029785	0.10141	0.992282	1773	4
C19orf40	5	0.029786	0.090357	0.992282	1774	1
OR10A7	6	0.029823	0.10149	0.992282	1775	2
SEC14L1	5	0.029832	0.090474	0.992282	1776	2
FAM131C	6	0.02984	0.10153	0.992282	1777	4
MIER3	6	0.029922	0.10171	0.992282	1778	1
CXCR1	5	0.029968	0.090835	0.992282	1779	2
KDM6B	5	0.029978	0.090858	0.992282	1780	4
NCOA5	6	0.029983	0.10185	0.992282	1781	3
TGFB1I1	5	0.029987	0.090884	0.992282	1782	3
DNAH2	6	0.03003	0.10195	0.992282	1783	3
FUCA2	6	0.030031	0.10195	0.992282	1784	3
CCSAP	5	0.03008	0.091125	0.992282	1785	3
CGB8	6	0.030085	0.10209	0.992282	1786	4
NOA1	5	0.030105	0.091191	0.992282	1787	3
LHB	5	0.030105	0.091192	0.992282	1788	3
TMEM191C	6	0.030108	0.10214	0.992282	1789	3
GGT1	4	0.030118	0.083156	0.992282	1790	2
C19orf59	6	0.03014	0.10221	0.992282	1791	3
EIF3G	6	0.030141	0.10221	0.992282	1792	4
THBS2	6	0.030158	0.10224	0.992282	1793	4
NAT1	6	0.030169	0.10227	0.992282	1794	3
C20orf112	6	0.030171	0.10227	0.992282	1795	3
SH3GLB1	6	0.030194	0.10233	0.992282	1796	3
EFNB1	5	0.030205	0.091452	0.992282	1797	4
ZBTB2	6	0.030213	0.10237	0.992282	1798	3
VPS13C	4	0.030267	0.083472	0.992282	1799	3
FCRL2	6	0.030301	0.10257	0.992282	1800	4
GSTA4	6	0.030303	0.10257	0.992282	1801	3
C2CD4A	6	0.030341	0.10265	0.992282	1802	4
PLA2G4E	5	0.030355	0.09184	0.992282	1803	3
RRP12	6	0.030395	0.10278	0.992282	1804	3
KRTAP4-9	5	0.030397	0.091935	0.992282	1805	4
FAM71A	4	0.030401	0.083749	0.992282	1806	2
SCARF2	6	0.030413	0.10282	0.992282	1807	1
LRRC58	5	0.030423	0.092004	0.992282	1808	2
AP3S1	5	0.030442	0.092056	0.992282	1809	2
SLC6A6	6	0.030456	0.10292	0.992282	1810	3
CYP11A1	5	0.030469	0.092137	0.992282	1811	3
OR8K3	6	0.030489	0.103	0.992282	1812	3
SPATS1	6	0.030566	0.10318	0.992282	1813	3
GCLC	6	0.030576	0.1032	0.992282	1814	3
LAMC2	5	0.030583	0.092448	0.992282	1815	2
ARHGEF10	5	0.03062	0.092546	0.992282	1816	4
DNM3	6	0.030627	0.10332	0.992282	1817	4
PSMA3	6	0.030631	0.10333	0.992282	1818	2
EZH2	6	0.030649	0.10337	0.992282	1819	4
RALGAPA1	6	0.030657	0.10338	0.992282	1820	4
PAPD7	6	0.030685	0.10345	0.992282	1821	2
TRIM65	6	0.030696	0.10347	0.992282	1822	3
SLK	6	0.030758	0.10362	0.992282	1823	4
FOLR1	6	0.03076	0.10363	0.992282	1824	3
C1orf56	4	0.030778	0.084531	0.992282	1825	2
EXOC8	6	0.030782	0.10367	0.992282	1826	4
C1orf86	5	0.03079	0.092985	0.992282	1827	4
SLC22A6	6	0.030794	0.1037	0.992282	1828	3
ARHGAP18	6	0.03082	0.10375	0.992282	1829	3
LEPREL1	6	0.030898	0.10394	0.992282	1830	4
DYNC2H1	5	0.030903	0.093293	0.992282	1831	2
UCN	6	0.030923	0.10399	0.992282	1832	4
SPDYE6	6	0.030942	0.10404	0.992282	1833	3
UAP1L1	6	0.030958	0.10407	0.992282	1834	3
TCEAL3	6	0.031012	0.1042	0.992282	1835	2
GDPD1	6	0.031067	0.10431	0.992282	1836	4
PSPC1	5	0.031081	0.093757	0.992282	1837	3
LAMC1	6	0.031088	0.10435	0.992282	1838	3
LONRF3	6	0.03109	0.10436	0.992282	1839	4
SMAD2	6	0.031121	0.10442	0.992282	1840	1
KCNT1	6	0.031124	0.10443	0.992282	1841	4
UBE2A	6	0.031145	0.10447	0.992282	1842	4
FLJ44313	6	0.031149	0.10448	0.992282	1843	3
SYAP1	4	0.031171	0.08535	0.992282	1844	3
ELMO1	6	0.031188	0.10457	0.992282	1845	4
FAM105A	6	0.031283	0.1048	0.992282	1846	3
DMTN	5	0.031333	0.094376	0.992282	1847	1
LRRC23	6	0.031394	0.10505	0.992282	1848	4
PXDNL	4	0.031402	0.08579	0.992282	1849	2
ZNF337	6	0.031408	0.10508	0.992282	1850	4
C11orf86	5	0.031419	0.094597	0.992282	1851	3
GAGE7	6	0.031445	0.10517	0.992282	1852	2
CPNE3	6	0.031448	0.10518	0.992282	1853	2
DPM2	6	0.031466	0.10522	0.992282	1854	4
NFX1	6	0.03149	0.10528	0.992282	1855	3
SMARCA4	6	0.031503	0.10531	0.992282	1856	3
CTRB1	2	0.031535	0.057544	0.992282	1857	2
RNASE9	6	0.031546	0.10541	0.992282	1858	3
BARX1	6	0.031613	0.10557	0.992282	1859	4
TMEM107	5	0.031632	0.09513	0.992282	1860	2
FAM160A2	6	0.031668	0.10569	0.992282	1861	3
LARP6	5	0.031683	0.095267	0.992282	1862	3
HRG	5	0.03169	0.095283	0.992282	1863	3
EPT1	6	0.031721	0.10583	0.992282	1864	3
EMR1	5	0.031733	0.09539	0.992282	1865	3
CD1B	6	0.031775	0.10596	0.992282	1866	2
DEFB131	5	0.031821	0.095635	0.992282	1867	4
RFT1	6	0.03183	0.10608	0.992282	1868	2
NLRP2	6	0.031836	0.10609	0.992282	1869	4
TMEM185A	6	0.031841	0.1061	0.992282	1870	3
EFCAB13	6	0.03185	0.10612	0.992282	1871	3
IARS	6	0.031884	0.1062	0.992282	1872	3
ROBO2	6	0.031884	0.10621	0.992282	1873	2
SLC10A6	6	0.031895	0.10622	0.992282	1874	2
SEC31A	6	0.031933	0.10631	0.992282	1875	4
RBCK1	6	0.031939	0.10632	0.992282	1876	3
FYB	6	0.031955	0.10636	0.992282	1877	4
ORAI1	5	0.031985	0.09607	0.992282	1878	2
CYP2C9	6	0.031993	0.10645	0.992282	1879	4
PTP4A2	6	0.031995	0.10645	0.992282	1880	4
SMCP	6	0.03203	0.10651	0.992282	1881	2
ZMYM3	6	0.032102	0.10669	0.992282	1882	3
OTUD3	6	0.032132	0.10676	0.992282	1883	4
EMILIN3	6	0.032156	0.10681	0.992282	1884	3
PAM	6	0.032181	0.10687	0.992282	1885	3
COL1A1	6	0.032234	0.10698	0.992282	1886	3
OTUD1	6	0.032256	0.10704	0.992282	1887	3
ANKRD17	6	0.032268	0.10707	0.992282	1888	3
EDA	4	0.0323	0.087595	0.992282	1889	1
TM4SF19	6	0.03232	0.10718	0.992282	1890	2
NDN	6	0.032335	0.10722	0.992282	1891	3
ZNF610	6	0.032374	0.10731	0.992282	1892	1
APITD1-CORT	6	0.032381	0.10732	0.992282	1893	4
C17orf112	6	0.032454	0.10749	0.992282	1894	3
EPHX2	6	0.03255	0.10772	0.992282	1895	4
PCDHGB5	3	0.032573	0.081233	0.992282	1896	3
MOSPD1	6	0.032655	0.10795	0.992282	1897	3
CXorf48	4	0.032664	0.088316	0.992282	1898	1
C9orf153	5	0.032696	0.097942	0.992282	1899	3
CPA6	6	0.032701	0.10806	0.992282	1900	3
UEVLD	6	0.03272	0.10811	0.992282	1901	4
KCNJ16	6	0.032744	0.10816	0.992282	1902	3
MYO6	6	0.032755	0.10818	0.992282	1903	4
C3orf58	6	0.032761	0.1082	0.992282	1904	4
OR14A16	5	0.032787	0.098178	0.992282	1905	3
DOCK3	6	0.032813	0.10831	0.992282	1906	3
NANOS2	5	0.032832	0.098305	0.992282	1907	3
C17orf49	6	0.032835	0.10836	0.992282	1908	4
ECE2	5	0.032874	0.098405	0.992282	1909	3
OR7G1	6	0.03291	0.10854	0.992282	1910	2
ENO4	6	0.032919	0.10856	0.992282	1911	3
AGBL2	6	0.032967	0.10867	0.992282	1912	4
HIST2H4B	6	0.032973	0.10869	0.992282	1913	4
HERC1	6	0.033001	0.10875	0.992282	1914	2
PSMB4	6	0.033012	0.10878	0.992282	1915	4
TRIM9	5	0.033025	0.098797	0.992282	1916	2
STMN4	6	0.033027	0.10882	0.992282	1917	4
PARVA	6	0.033062	0.1089	0.992282	1918	4
DPP4	6	0.033069	0.10892	0.992282	1919	4
TYRP1	6	0.033075	0.10893	0.992282	1920	2
FAM160B1	5	0.033078	0.09895	0.992282	1921	4
MAL2	6	0.033088	0.10896	0.992282	1922	3
MSL1	6	0.033105	0.10899	0.992282	1923	4
PHF15	6	0.033136	0.10906	0.992282	1924	2
SCOC	6	0.033191	0.10919	0.992282	1925	1
SLC25A31	6	0.033211	0.10924	0.992282	1926	4
KRTAP12-3	5	0.033243	0.099365	0.992282	1927	4
POU2AF1	6	0.033293	0.10943	0.992282	1928	2
TM7SF3	6	0.033299	0.10945	0.992282	1929	4
PCDHGB3	2	0.033321	0.060674	0.992282	1930	2
CAPN9	6	0.033354	0.10958	0.992282	1931	2
GPD1	6	0.033366	0.1096	0.992282	1932	4
TP53TG3D	6	0.033385	0.10964	0.992282	1933	3
EHBP1L1	6	0.033388	0.10965	0.992282	1934	4
SLC9A7	6	0.03339	0.10965	0.992282	1935	3
IMMP1L	6	0.033408	0.1097	0.992282	1936	3
CD163L1	6	0.033419	0.10972	0.992282	1937	2
CCDC69	6	0.033429	0.10974	0.992282	1938	4
SMPD2	6	0.033465	0.10982	0.992282	1939	4
LCN15	6	0.033499	0.1099	0.992282	1940	3
PUS1	5	0.033504	0.10002	0.992282	1941	4
MAVS	5	0.033508	0.10003	0.992282	1942	4
PRR23B	5	0.03351	0.10003	0.992282	1943	3
TTLL9	5	0.033513	0.10004	0.992282	1944	1
HIST1H2BM	6	0.033516	0.10994	0.992282	1945	4
CCNL1	5	0.033518	0.10006	0.992282	1946	3
IL36G	6	0.033571	0.11007	0.992282	1947	2
HSPA6	6	0.033592	0.11012	0.992282	1948	3
SDC3	6	0.033626	0.1102	0.992282	1949	2
YWHAE	6	0.03363	0.11021	0.992282	1950	3
C22orf15	6	0.03368	0.11032	0.992282	1951	2
LOC283710	5	0.033695	0.10047	0.992282	1952	2
NIM1	5	0.033703	0.10049	0.992282	1953	3
CBX8	6	0.033735	0.11045	0.992282	1954	4
ZFAND4	5	0.03374	0.10057	0.992282	1955	2
LRRC3	6	0.033776	0.11053	0.992282	1956	3
DENND5A	5	0.033785	0.10068	0.992282	1957	3
ACER3	6	0.033789	0.11057	0.992282	1958	3
ARHGEF5	6	0.03379	0.11057	0.992282	1959	4
TMEM232	6	0.033817	0.11064	0.992282	1960	4
CENPT	6	0.033845	0.1107	0.992282	1961	2
ZBTB22	6	0.033875	0.11077	0.992282	1962	3
ARMC1	5	0.033876	0.10091	0.992282	1963	3
PDIK1L	6	0.033898	0.11083	0.992282	1964	1
NEURL4	6	0.033902	0.11084	0.992282	1965	4
PLAA	5	0.033922	0.10102	0.992282	1966	2
TLX1	6	0.033938	0.11093	0.992282	1967	4
EIF3H	6	0.033959	0.11097	0.992282	1968	3
ABCB11	6	0.033959	0.11097	0.992282	1969	3
GPR21	3	0.033971	0.084376	0.992282	1970	3
CCL11	5	0.033977	0.10117	0.992282	1971	4
CTH	5	0.034047	0.10134	0.992282	1972	2
RFXAP	5	0.03406	0.10138	0.992282	1973	3
CALML4	6	0.03407	0.11123	0.992282	1974	4
CEP164	5	0.034099	0.10146	0.992282	1975	2
FOXE3	6	0.034111	0.11133	0.992282	1976	2
DAAM2	6	0.034115	0.11134	0.992282	1977	2
RRAGD	6	0.034134	0.11138	0.992282	1978	4
UBE2L3	6	0.03417	0.11145	0.992282	1979	3
BUD13	6	0.034177	0.11147	0.992282	1980	4
SEMA6D	5	0.034243	0.10183	0.992282	1981	3
ZNF701	4	0.034264	0.091595	0.992282	1982	3
MCM10	6	0.034277	0.11168	0.992282	1983	4
CASP12	6	0.034292	0.11173	0.992282	1984	4
APIP	6	0.034333	0.11181	0.992282	1985	3
SEC23B	5	0.034375	0.10217	0.992282	1986	2
CHIC1	6	0.034387	0.11194	0.992282	1987	2
SCAF8	5	0.034406	0.10226	0.992282	1988	3
DEFB124	6	0.034413	0.112	0.992282	1989	4
DTWD1	5	0.034428	0.10231	0.992282	1990	3
PRELP	6	0.034439	0.11205	0.992282	1991	4
ZNF736	6	0.034441	0.11205	0.992282	1992	2
TGFA	6	0.034444	0.11206	0.992282	1993	4
SUGT1	3	0.034482	0.085529	0.992282	1994	3
TIMM13	5	0.034486	0.10246	0.992282	1995	4
USP40	6	0.034518	0.11223	0.992282	1996	4
UFC1	6	0.034549	0.11229	0.992282	1997	4
RNF157	6	0.03455	0.1123	0.992282	1998	3
[truncated: 16,904 more rows]
